# Supplementary material for: Magnetic nanoparticle-infiltrated hydroxyapatite scaffolds accelerate osteoclast apoptosis by inhibiting autophagy-aggravated ER stress
Source: Royal Society of Chemistry journal article supplement (doi:10.1039/d2tb01392d), 2022-01-01
Supplement: d2tb01392d1.pdf [file d2tb01392d1.pdf]

## Supporting Information

### Magnetic nanoparticles-infiltrated hydroxyapatite scaffolds accelerate osteoclast apoptosis by inhibiting autophagy aggravated ER stress

Yue Zhu<sup>b,c</sup>, Zhiyu Li<sup>a</sup>, Xiaoqing Sun<sup>a</sup>, Yichun Gao<sup>a</sup>, Ke Kang<sup>a</sup>, Jing He<sup>\*a</sup> and Yao Wu<sup>\*a</sup>

<sup>a</sup> National Engineering Research Center for Biomaterials, Sichuan University, Chengdu, Sichuan 610064, P.R. China

<sup>b</sup> College of Pharmaceutical Sciences, Guizhou University of Traditional Chinese Medicine, Huaxi university town, Dongqing South Road, Guiyang 550025, Guizhou, China

<sup>c</sup> Nano-drug Technology Research Center at Guizhou University of Traditional Chinese Medicine, Guiyang 550025, China

E-mail: jinghe30@scu.edu.cn, wuyao@scu.edu.cn

**Table S1.** List of the proteins related to apoptotic.

| Protein IDs | Protein names                            | HA-1d | MHA-1d | HA-4d | MHA-4d | HA-7d | MHA-7d |
|-------------|------------------------------------------|-------|--------|-------|--------|-------|--------|
| A0A0G2JWK0  | Integrin beta                            | 0.03% |        |       |        | 0.05% | 0.06%  |
| A0A0H2UHM5  | Protein disulfide-isomerase              | 0.18% | 0.19%  | 0.16% | 0.12%  | 0.13% | 0.24%  |
| B6DYQ7      | Glutathione S-transferase                | 0.28% | 0.35%  | 0.38% | 0.30%  | 0.26% | 0.26%  |
| D3ZYK8      | Matrix metalloproteinase 9               |       | 0.02%  | 0.26% | 0.44%  | 0.25% | 0.41%  |
| O88767      | Protein/nucleic acid deglycase DJ-1      | 0.33% | 0.46%  | 0.25% | 0.13%  | 0.21% | 0.42%  |
| P02680      | Fibrinogen gamma chain                   | 0.30% | 0.38%  | 0.27% | 0.31%  | 0.29% | 0.26%  |
| P04785      | Protein disulfide-isomerase              | 0.22% | 0.21%  | 0.21% | 0.19%  | 0.15% | 0.21%  |
| P04797      | Glyceraldehyde-3-phosphate dehydrogenase | 0.77% | 0.71%  | 0.66% | 0.64%  | 0.72% | 0.58%  |

|            |                                               |       |       |       |       |       |       |
|------------|-----------------------------------------------|-------|-------|-------|-------|-------|-------|
| P06762     | Heme oxygenase 1                              |       | 0.08% |       |       |       |       |
| P07150     | Annexin A1                                    | 0.10% | 0.14% | 0.05% | 0.21% |       | 0.26% |
| P10683     | Galanin peptides                              |       |       |       |       |       | 0.17% |
| P11762     | Galectin-1                                    | 0.45% | 0.74% | 0.40% | 0.77% | 0.21% | 0.77% |
| P14480     | Fibrinogen beta chain                         | 0.40% | 0.39% | 0.35% | 0.38% | 0.30% | 0.31% |
| P19804     | Nucleoside diphosphate kinase B               | 0.49% | 0.42% | 0.40% | 0.31% | 0.48% | 0.53% |
| P28480     | T-complex protein 1 subunit alpha             | 0.05% |       |       | 0.03% |       |       |
| P30120     | Metalloproteinase inhibitor 1                 |       |       | 0.08% | 0.07% | 0.09% | 0.10% |
| P34058     | Heat shock protein HSP 90-beta                | 0.36% | 0.31% | 0.34% | 0.36% | 0.32% | 0.35% |
| P37377     | Alpha-synuclein                               |       | 0.50% |       | 0.36% |       | 0.37% |
| P45479     | Palmitoyl-protein thioesterase 1              |       |       | 0.06% |       | 0.09% | 0.04% |
| P46462     | Transitional endoplasmic reticulum ATPase     | 0.28% | 0.13% | 0.13% | 0.12% | 0.09% | 0.13% |
| P52555     | Endoplasmic reticulum resident protein 29     |       |       |       | 0.09% |       | 0.16% |
| Q3T1J1     | Eukaryotic translation initiation factor 5A-1 | 0.34% | 0.33% | 0.29% | 0.32% | 0.31% | 0.27% |
| Q68FP1     | Gelsolin                                      | 0.30% | 0.30% | 0.30% | 0.26% | 0.30% | 0.23% |
| Q68FP3     | C-C motif chemokine 6                         |       |       |       | 0.14% |       |       |
| Q6AYD3     | Proliferation-associated protein 2G4          | 0.17% | 0.13% | 0.18% | 0.10% | 0.07% | 0.10% |
| Q8CFN2     | Cell division control protein 42 homolog      | 0.31% | 0.30% | 0.33% | 0.29% | 0.24% | 0.29% |
| Q91ZN1     | Coronin-1A                                    | 0.11% | 0.13% | 0.10% | 0.10% | 0.06% | 0.10% |
| A0A0G2K689 | Uncharacterized protein                       | 0.20% |       |       |       |       |       |

**Table S2.** List of the proteins related to cell proliferation.

| Protein IDs | Protein names              | HA-1d | MHA-1d | HA-4d | MHA-4d | HA-7d | MHA-7d |
|-------------|----------------------------|-------|--------|-------|--------|-------|--------|
| A0A096P6L8  | Fibronectin                | 0.77% | 0.67%  | 1.16% | 0.96%  | 1.16% | 0.94%  |
| A0A0G2JSH9  | Peroxiredoxin-2            | 0.13% | 0.13%  | 0.14% | 0.12%  | 0.14% | 0.11%  |
| A0A0H2UHM7  | Tubulin alpha chain        | 0.34% | 0.37%  | 0.36% | 0.34%  | 0.31% | 0.31%  |
| C0JPT7      | Filamin A                  | 0.55% | 0.55%  | 0.46% | 0.51%  | 0.47% | 0.42%  |
| E9PSM5      | 72 kDa type IV collagenase |       |        | 0.12% | 0.12%  | 0.11% | 0.14%  |
| F1LQS6      | RCG61833                   | 0.02% |        | 0.02% |        | 0.02% | 0.01%  |
| F1M7J7      | Centrosomal protein 250    |       | 0.01%  |       |        |       |        |
| F1M7X3      | Cadherin 13                | 0.07% | 0.03%  | 0.06% | 0.03%  | 0.06% | 0.03%  |
| P07895      | Superoxide dismutase       | 0.12% | 0.11%  | 0.12% | 0.11%  | 0.13% | 0.09%  |
| P07943      | Aldose reductase           | 0.16% | 0.08%  | 0.11% | 0.07%  | 0.09% | 0.06%  |

|        |                                                      |       |       |       |       |       |       |
|--------|------------------------------------------------------|-------|-------|-------|-------|-------|-------|
| P16975 | SPARC                                                | 0.17% | 0.13% | 0.23% | 0.05% | 0.27% | 0.18% |
| P51583 | Multifunctional protein ADE2                         | 0.04% | 0.06% |       |       |       | 0.03% |
| P63029 | Translationally-controlled tumor protein             | 0.20% | 0.28% | 0.15% | 0.09% | 0.16% | 0.12% |
| P85108 | Tubulin beta-2A chain                                | 0.23% | 0.33% | 0.20% | 0.21% | 0.14% | 0.24% |
| Q58NB7 | Retinoic acid receptor responder                     | 0.06% | 0.09% | 0.19% | 0.08% | 0.16% | 0.07% |
| Q5XIF6 | Tubulin alpha-4A chain                               | 0.30% | 0.31% | 0.26% | 0.28% | 0.21% | 0.26% |
| Q62611 | Interleukin-1 receptor-like 1                        |       |       |       | 0.07% | 0.06% | 0.08% |
| Q62636 | Ras-related protein Rap-1b                           | 1.00% | 0.79% | 1.04% | 0.76% | 0.94% | 0.70% |
| Q63798 | Proteasome activator complex subunit 2               | 0.11% | 0.17% | 0.07% | 0.13% |       |       |
| Q66HR2 | Microtubule-associated protein RP/EB family member 1 | 0.19% | 0.09% | 0.16% |       | 0.14% | 0.08% |
| Q66X93 | Staphylococcal nuclease domain-containing protein 1  | 0.10% | 0.06% | 0.07% | 0.05% | 0.03% | 0.02% |
| Q6MG61 | Chloride intracellular channel protein 1             | 0.14% | 0.34% | 0.22% | 0.33% | 0.23% | 0.40% |
| Q6P9V1 | Tetraspanin                                          |       |       |       | 0.07% |       | 0.06% |
| Q80ZA3 | Alpha-2 antiplasmin                                  | 0.16% | 0.22% | 0.53% | 0.50% | 0.51% | 0.46% |
| Q99J82 | Integrin-linked protein kinase                       | 0.22% | 0.20% | 0.23% | 0.14% | 0.26% | 0.16% |
| Q9QZK5 | Serine protease HTRA1                                | 0.07% | 0.04% | 0.19% | 0.19% | 0.22% | 0.22% |
| Q9R1T3 | Cathepsin Z                                          | 0.08% | 0.11% | 0.09% |       | 0.18% | 0.18% |
| Q6AYD3 | Proliferation-associated protein 2G4                 | 0.17% | 0.13% | 0.18% | 0.10% | 0.07% | 0.10% |

**Table S3.** List of the proteins related to cytoskeleton.

| Protein IDs | Protein names                 | HA-1d | MHA-1d | HA-4d | MHA-4d | HA-7d | MHA-7d |
|-------------|-------------------------------|-------|--------|-------|--------|-------|--------|
| A0A0G2K2J1  | Arp2/3 complex 34 kDa subunit | 0.31% | 0.40%  | 0.32% | 0.19%  | 0.34% | 0.29%  |
| A0A0H2UHM7  | Tubulin alpha chain           | 0.34% | 0.37%  | 0.36% | 0.34%  | 0.31% | 0.31%  |
| B2RYP4      | Sorting nexin 2               | 0.05% |        | 0.05% | 0.03%  |       | 0.04%  |
| D3ZRX9      | Calponin                      | 0.24% | 0.23%  | 0.12% | 0.18%  | 0.21% | 0.16%  |
| D3ZY51      | Plakophilin 1                 |       |        |       |        |       | 0.02%  |
| D4A3X0      | Centrosomal protein 192       | 0.02% | 0.02%  | 0.02% | 0.02%  | 0.02% | 0.01%  |
| D4A8D5      | Filamin B                     | 0.01% | 0.02%  | 0.01% | 0.02%  |       | 0.01%  |
| F1LMV6      | Desmoplakin                   | 0.05% | 0.05%  | 0.04% | 0.01%  | 0.02% | 0.04%  |
| F1LMW7      | Myristoylated alanine-        | 0.13% | 0.15%  | 0.10% | 0.12%  |       | 0.08%  |

| rich C-kinase substrate |                                                             |       |       |       |       |       |       |
|-------------------------|-------------------------------------------------------------|-------|-------|-------|-------|-------|-------|
| G3V8C3                  | Vimentin                                                    | 1.13% | 1.19% | 1.16% | 1.07% | 1.31% | 1.05% |
| P09495                  | Tropomyosin alpha-4 chain                                   | 1.07% | 0.99% | 1.14% | 0.96% | 0.98% | 0.96% |
| P47942                  | Dihydropyrimidinase-related protein 2                       | 0.18% | 0.12% | 0.17% | 0.07% | 0.13% | 0.10% |
| P62329                  | Thymosin beta-4                                             | 2.07% | 2.16% | 1.95% | 1.76% | 2.04% | 1.50% |
| P62775                  | Myotrophin                                                  | 0.44% | 0.35% | 0.23% | 0.21% |       | 0.18% |
| P63004                  | Platelet-activating factor acetylhydrolase subunit alpha IB | 0.06% |       | 0.06% |       | 0.04% |       |
| P68136                  | Actin, alpha skeletal muscle                                | 0.68% | 0.65% | 0.85% | 0.72% | 0.83% | 0.60% |
| P68370                  | Tubulin alpha-1A chain                                      | 0.42% | 0.42% | 0.45% | 0.41% | 0.39% | 0.29% |
| Q08163                  | Adenylyl cyclase-associated protein 1                       | 0.53% | 0.50% | 0.34% | 0.46% | 0.42% | 0.44% |
| Q3T1K5                  | F-actin-capping protein subunit alpha-2                     | 0.55% | 0.50% | 0.27% | 0.35% | 0.12% | 0.35% |
| Q4KLF8                  | Actin-related protein 2/3 complex subunit 5                 |       | 0.33% |       | 0.16% |       | 0.33% |
| Q562B2                  | Pls3 protein                                                | 0.05% | 0.10% | 0.06% | 0.05% | 0.08% | 0.06% |
| Q5RKI0                  | WD repeat-containing protein 1                              | 0.04% | 0.08% | 0.07% | 0.09% | 0.09% | 0.06% |
| Q5XI32                  | F-actin-capping protein subunit beta                        | 0.34% | 0.27% | 0.29% | 0.32% | 0.34% | 0.27% |
| Q5XI38                  | Lymphocyte cytosolic protein 1                              | 0.20% | 0.40% | 0.17% | 0.42% | 0.16% | 0.46% |
| Q63610                  | Tropomyosin alpha-3 chain                                   | 1.21% | 1.32% | 1.22% | 1.16% | 0.92% | 1.08% |
| Q68FX4                  | Hematopoietic cell-specific LYN substrate 1                 | 0.07% | 0.05% | 0.06% | 0.07% | 0.04% | 0.07% |
| Q6GMN8                  | Actn1 protein                                               | 0.24% | 0.25% | 0.26% | 0.16% | 0.30% | 0.15% |
| Q6P9V9                  | Tubulin alpha-1B chain                                      | 0.42% | 0.42% | 0.45% | 0.39% | 0.39% | 0.31% |
| Q7M0E3                  | Destrin                                                     | 0.36% | 0.35% | 0.21% | 0.33% | 0.17% | 0.29% |
| Q9Z1Z9                  | PDZ and LIM domain protein 7                                |       | 0.05% |       | 0.05% |       | 0.05% |
| Q5XI04                  | RCG45489                                                    | 0.06% |       |       |       | 0.07% |       |
| A0A0G2JWK7              | Transgelin                                                  | 0.12% | 0.12% | 0.13% |       |       |       |
| A0A0H2UHR7              | Filamin-C                                                   | 0.01% | 0.01% | 0.02% | 0.01% | 0.01% | 0.01% |
| A0A1W2Q6E9              | Moesin                                                      | 0.36% | 0.38% | 0.34% | 0.27% | 0.29% | 0.31% |
| B2GUZ5                  | F-actin-capping protein subunit alpha-1                     | 0.32% | 0.17% | 0.18% | 0.08% | 0.16% | 0.23% |
| B2RZ72                  | Actin-related protein 2/3 complex subunit 4                 | 0.34% | 0.23% | 0.30% | 0.27% | 0.31% | 0.31% |

|            |                                                       |       |       |       |       |       |       |
|------------|-------------------------------------------------------|-------|-------|-------|-------|-------|-------|
| G3V6P7     | Myosin, heavy polypeptide 9, non-muscle               | 0.13% | 0.10% | 0.10% | 0.07% | 0.07% | 0.10% |
| O88656     | Actin-related protein 2/3 complex subunit 1B          | 0.25% | 0.20% | 0.19% | 0.17% | 0.18% | 0.17% |
| P61983     | 14-3-3 protein gamma                                  | 0.60% | 0.61% | 0.70% | 0.47% | 0.66% | 0.51% |
| Q66H98     | Caveolae-associated protein 2                         | 0.04% | 0.06% | 0.06% | 0.06% | 0.07% | 0.05% |
| Q6AYC4     | Macrophage-capping protein                            | 0.29% | 0.38% | 0.26% | 0.43% | 0.21% | 0.32% |
| Q99MZ8     | LIM and SH3 domain protein 1                          | 0.16% | 0.12% |       | 0.09% |       | 0.10% |
| D4AA54     | Pleckstrin homology                                   | 0.02% | 0.02% | 0.02% | 0.02% | 0.02% | 0.02% |
| D4ACB8     | Chaperonin subunit 8                                  | 0.13% | 0.06% | 0.12% | 0.09% | 0.05% | 0.06% |
| G3V7C6     | Tubulin beta chain                                    | 0.28% | 0.33% | 0.23% | 0.23% | 0.17% | 0.28% |
| P60711     | Actin, cytoplasmic 1                                  | 1.32% | 1.31% | 1.30% | 1.27% | 1.38% | 1.10% |
| A0A0G2JUG1 | Uncharacterized protein                               | 0.18% | 0.22% | 0.15% | 0.17% | 0.16% | 0.16% |
| A0A0H2UHL3 | Adipocyte enhancer-binding protein 1                  |       |       | 0.09% | 0.03% | 0.10% | 0.05% |
| G3V908     | Type II keratin Kb15                                  | 0.43% | 0.36% | 0.31% | 0.26% | 0.30% | 0.28% |
| G3V9E3     | Caldesmon 1, isoform CRA_b                            | 0.08% | 0.09% |       | 0.07% |       | 0.08% |
| M0R8A4     | Uncharacterized protein                               |       |       |       |       |       | 0.08% |
| O08727     | Tumor necrosis factor receptor superfamily member 11B |       |       |       | 0.07% |       |       |
| P70482     | Lamin C2                                              | 0.11% | 0.10% | 0.11% | 0.22% | 0.18% | 0.19% |
| Q6IFV5     | Keratin 36                                            | 0.05% | 0.05% | 0.08% | 0.07% | 0.08% | 0.04% |

**Table S4.** List of the proteins related to cell-substrate junction.

| Protein IDs | Protein names                                                 | HA-1d | MHA-1d | HA-4d | MHA-4d | HA-7d | MHA-7d |
|-------------|---------------------------------------------------------------|-------|--------|-------|--------|-------|--------|
| A0A0G2KAJ7  | Collagen alpha-1(XII) chain                                   |       |        | 0.06% |        | 0.10% | 0.04%  |
| A0A0H2UHL3  | Adipocyte enhancer-binding protein 1                          |       |        | 0.09% | 0.03%  | 0.10% | 0.05%  |
| B2RYL9      | Parvb protein                                                 | 0.30% | 0.28%  | 0.31% | 0.28%  | 0.32% | 0.24%  |
| C0KUC5      | LIM and senescent cell antigen-like-containing domain protein | 0.14% | 0.11%  | 0.14% | 0.08%  | 0.10% | 0.09%  |
| D3ZQ45      | Desmoglein 1                                                  | 0.03% | 0.03%  | 0.04% | 0.03%  | 0.04% | 0.02%  |
| D4A3E0      | Multimerin 1                                                  | 0.02% | 0.02%  |       | 0.02%  |       |        |
| D4A8G5      | Transforming growth factor                                    | 0.04% | 0.11%  | 0.07% | 0.11%  | 0.04% | 0.09%  |
| F1LM84      | Nidogen-1                                                     |       |        | 0.03% |        | 0.05% | 0.02%  |

|        |                                                                |       |       |       |       |       |       |
|--------|----------------------------------------------------------------|-------|-------|-------|-------|-------|-------|
| F1M9B2 | Insulin-like growth factor binding protein 7                   |       |       |       | 0.37% |       | 0.32% |
| G3V624 | Coronin                                                        | 0.36% | 0.38% | 0.30% | 0.33% | 0.23% | 0.32% |
| G3V6X1 | Fibulin 2                                                      |       |       | 0.14% |       | 0.16% | 0.02% |
| G3V852 | RCG55135                                                       | 0.61% | 0.62% | 0.59% | 0.58% | 0.55% | 0.55% |
| O35186 | Cathepsin K                                                    |       |       | 0.16% | 0.12% | 0.25% | 0.31% |
| P34901 | Syndecan-4                                                     | 0.09% |       | 0.13% |       | 0.09% |       |
| P51886 | Lumican                                                        | 0.10% | 0.07% | 0.08% | 0.25% | 0.22% | 0.38% |
| P97827 | Osteopontin                                                    |       |       |       |       | 0.15% | 0.13% |
| P70565 | Plakoglobin                                                    | 0.02% | 0.08% | 0.02% | 0.02% |       | 0.07% |
| Q0V8T5 | Contactin-associated protein like 5-2                          |       |       |       | 0.04% |       | 0.03% |
| Q3KR76 | Plasminogen activator, urokinase                               | 0.14% | 0.38% | 0.27% | 0.41% | 0.34% | 0.45% |
| Q5I0D7 | Xaa-Pro dipeptidase                                            | 0.10% | 0.07% | 0.07% | 0.03% | 0.11% | 0.06% |
| Q5U1Y2 | Rac family small GTPase 2                                      | 0.31% | 0.34% | 0.23% | 0.33% | 0.19% | 0.32% |
| Q6IN22 | Cathepsin B                                                    | 0.38% | 0.46% | 0.55% | 0.40% | 0.60% | 0.49% |
| Q9JI30 | Integrin beta 2 alpha subunit                                  |       |       | 0.02% | 0.01% | 0.05% | 0.03% |
| R9PXU6 | Vinculin                                                       | 0.66% | 0.82% | 0.53% | 0.71% | 0.52% | 0.68% |
| C9WPN6 | Eukaryotic translation initiation factor 2 subunit 3, Y-linked | 0.06% | 0.05% | 0.06% |       | 0.06% | 0.03% |
| D3ZY51 | Plakophilin 1                                                  |       |       |       |       |       | 0.02% |
| F1MAA7 | Laminin subunit gamma 1                                        |       |       | 0.02% |       | 0.03% |       |
| O70513 | Galectin-3-binding protein                                     |       |       | 0.06% | 0.07% | 0.06% | 0.07% |
| P38983 | 40S ribosomal protein SA                                       | 0.26% | 0.19% | 0.24% | 0.24% | 0.25% | 0.16% |
| D3ZK14 | Tenascin N                                                     |       | 0.02% | 0.31% | 0.13% | 0.34% | 0.22% |

**Table S5.** List of the proteins related to ROS.

| Protein IDs | Protein names                                        | HA-1d | MHA-1d | HA-4d | MHA-4d | HA-7d | MHA-7d |
|-------------|------------------------------------------------------|-------|--------|-------|--------|-------|--------|
| A0A0G2JSS8  | Peroxiredoxin 5                                      | 0.43% | 0.37%  | 0.27% | 0.36%  | 0.33% | 0.35%  |
| A0A0G2K531  | Glutathione peroxidase                               |       | 0.22%  | 0.23% | 0.14%  | 0.24% | 0.36%  |
| A0A0G2K737  | Thioredoxin-like protein 1                           | 0.15% | 0.08%  | 0.18% | 0.11%  | 0.09% | 0.07%  |
| A0A0G2KAH2  | Peroxidasin                                          | 0.02% | 0.02%  | 0.01% |        |       | 0.03%  |
| B2GUV5      | V-type proton ATPase subunit G                       | 0.42% | 0.27%  | 0.43% | 0.39%  | 0.45% | 0.33%  |
| B2RZ27      | SH3 domain binding glutamic acid-rich protein-like 3 | 0.54% | 0.52%  | 0.85% | 0.76%  | 0.89% | 0.66%  |
| D4A133      | ATPase H <sup>+</sup> -                              | 0.08% | 0.08%  | 0.09% | 0.05%  | 0.08% | 0.06%  |

|            |                                               |       |       |       |       |       |       |
|------------|-----------------------------------------------|-------|-------|-------|-------|-------|-------|
|            | transporting V1 subunit<br>A                  |       |       |       |       |       |       |
| F1M983     | Complement factor H                           | 0.08% | 0.13% | 0.27% | 0.26% | 0.31% | 0.27% |
| F1M9V7     | Aminopeptidase                                | 0.02% | 0.03% | 0.03% | 0.02% | 0.02% | 0.02% |
| O08591     | Perlecan                                      |       |       | 0.40% |       | 0.42% |       |
| O35244     | Peroxiredoxin-6                               | 0.31% | 0.33% | 0.32% | 0.21% | 0.37% | 0.28% |
| P00507     | Aspartate<br>aminotransferase                 |       |       | 0.04% |       | 0.07% | 0.05% |
| P02454     | Collagen alpha-1(I)<br>chain                  | 0.10% | 0.05% | 0.38% | 0.29% | 0.43% | 0.28% |
| P03957     | Stromelysin-1                                 |       |       |       |       |       | 0.07% |
| P04762     | Catalase                                      | 0.03% |       | 0.03% |       |       |       |
| P04961     | Proliferating cell<br>nuclear antigen         | 0.13% |       | 0.10% |       |       |       |
| P05982     | NAD(P)H<br>dehydrogenase                      | 0.15% | 0.09% | 0.13% | 0.09% | 0.10% | 0.05% |
| Q91YB6     | Complement inhibitory<br>factor H             | 0.06% | 0.11% | 0.26% | 0.25% | 0.29% | 0.27% |
| Q9Z0V5     | Peroxiredoxin-4                               | 0.21% | 0.21% | 0.32% | 0.26% | 0.20% | 0.22% |
| P11232     | Thioredoxin                                   | 0.49% | 0.47% | 0.59% | 0.61% | 0.53% | 0.39% |
| P11980     | Pyruvate kinase PKM                           | 0.89% | 0.77% | 0.73% | 0.75% | 0.75% | 0.66% |
| P14841     | Cystatin-C                                    | 0.31% | 0.18% | 0.38% | 0.34% | 0.40% | 0.25% |
| P52944     | PDZ and LIM domain<br>protein 1               | 0.08% | 0.08% | 0.08% | 0.07% | 0.09% | 0.06% |
| P54311     | Guanine nucleotide-<br>binding protein G      | 0.23% | 0.15% | 0.21% | 0.14% | 0.25% | 0.08% |
| P61589     | Transforming protein<br>RhoA                  | 0.31% | 0.25% | 0.23% | 0.20% | 0.19% | 0.18% |
| Q5M860     | Rho GDP dissociation<br>inhibitor beta        | 0.46% | 0.36% | 0.30% | 0.19% | 0.23% | 0.23% |
| Q9JJ54     | Heterogeneous nuclear<br>ribonucleoprotein D0 | 0.07% | 0.05% |       | 0.07% |       | 0.04% |
| Q99J86     | Attractin                                     | 0.10% | 0.11% | 0.09% | 0.10% | 0.12% | 0.09% |
| A0A0G2K3Z9 | Uncharacterized<br>protein                    | 0.90% | 1.11% | 0.76% | 1.00% | 0.75% | 0.76% |
| B1H216     | Globin c3                                     | 0.19% | 0.12% | 0.19% | 0.17% | 0.20% | 0.20% |
| P05065     | Fructose-bisphosphate<br>aldolase A           | 0.68% | 0.86% | 0.68% | 0.70% | 0.55% | 0.74% |
| P14630     | Apolipoprotein M                              | 0.13% | 0.13% | 0.14% | 0.08% | 0.14% | 0.11% |

**Table S6.** List of the proteins related to ATP.

| Protein IDs | Protein names  | HA-1d | MHA-1d | HA-4d | MHA-4d | HA-7d | MHA-7d |
|-------------|----------------|-------|--------|-------|--------|-------|--------|
| A0A0A0MY09  | Endoplasmic    | 0.11% | 0.13%  | 0.17% | 0.13%  | 0.19% | 0.13%  |
| B2GUW7      | Rnase4 protein | 0.15% |        |       | 0.21%  |       | 0.12%  |

|            |                                                             |       |       |       |       |       |       |
|------------|-------------------------------------------------------------|-------|-------|-------|-------|-------|-------|
| F1LP05     | ATP synthase subunit alpha                                  |       | 0.08% |       | 0.06% | 0.22% | 0.20% |
| G3V7L8     | ATPase, H <sup>+</sup> transporting, V1 subunit E isoform 1 | 0.07% |       |       | 0.07% |       | 0.09% |
| P07335     | Creatine kinase B-type                                      | 0.40% | 0.34% | 0.42% | 0.44% | 0.39% | 0.45% |
| P20961     | Plasminogen activator inhibitor 1                           | 0.25% | 0.47% | 0.26% | 0.51% | 0.23% | 0.44% |
| R4I4V9     | Neutrophil cytosolic factor 2 mutant isoform 2              | 0.03% | 0.03% | 0.04% |       |       | 0.03% |
| P85515     | Alpha-centractin                                            | 0.04% |       |       |       |       |       |
| Q6AXQ3     | Tyrosine-protein kinase                                     | 0.07% | 0.05% | 0.09% | 0.08% | 0.09% | 0.08% |
| Q7TPB1     | T-complex protein 1 subunit delta                           | 0.11% | 0.05% | 0.05% | 0.08% | 0.04% | 0.08% |
| D3ZRN3     | Actin, beta-like 2 (Similar to cytoplasmic beta-actin)      | 0.45% | 0.46% | 0.52% | 0.44% | 0.59% | 0.36% |
| F1LQB2     | Structural maintenance of chromosomes protein               | 0.02% | 0.02% | 0.02% | 0.02% | 0.02% | 0.02% |
| F1LRV4     | Heat shock 70 kDa protein 4                                 | 0.06% | 0.04% | 0.04% | 0.03% | 0.05% | 0.03% |
| P16617     | Phosphoglycerate kinase 1                                   | 0.38% | 0.41% | 0.27% | 0.30% | 0.35% | 0.43% |
| Q5BJY2     | Cct6a protein                                               | 0.18% | 0.14% | 0.11% | 0.10% | 0.12% | 0.09% |
| Q5XIE8     | Integral membrane protein 2B                                |       |       | 0.10% | 0.15% |       | 0.10% |
| Q6P3V8     | Eukaryotic translation initiation factor 4A1                | 0.12% | 0.08% | 0.04% | 0.08% | 0.07% | 0.10% |
| Q9R0I8     | Phosphatidylinositol 5-phosphate 4-kinase type-2 alpha      |       | 0.06% | 0.04% |       |       | 0.03% |
| A0A0G2JUL7 | Septin 6                                                    | 0.13% |       | 0.06% |       | 0.06% |       |
| A0A0G2JV81 | FKBP prolyl isomerase 11                                    | 0.28% | 0.36% | 0.38% | 0.34% | 0.35% | 0.30% |
| A0A0G2JZR4 | Ras-related protein Rab-11B                                 | 0.58% | 0.52% | 0.49% | 0.43% | 0.51% | 0.38% |
| A0A0G2K930 | Ras-related protein Rab-7a                                  | 0.27% | 0.26% | 0.14% | 0.21% | 0.15% | 0.18% |
| D3ZMS5     | T-cell lymphoma invasion and metastasis 2                   | 0.01% | 0.01% | 0.02% | 0.01% | 0.02% | 0.01% |
| D4A8F2     | Ras suppressor protein 1                                    | 0.33% | 0.35% | 0.35% | 0.25% | 0.26% | 0.37% |
| F1LMC7     | Septin-7                                                    | 0.06% | 0.11% |       | 0.09% |       | 0.06% |
| F1LP82     | Ras-related protein Rab-2A                                  | 0.12% | 0.12% | 0.13% | 0.12% | 0.14% | 0.07% |
| F1LVC3     | RAB6B, member RAS oncogene family                           | 0.14% | 0.14% | 0.15% | 0.13% | 0.21% | 0.12% |

|        |                                                    |       |       |       |       |       |       |
|--------|----------------------------------------------------|-------|-------|-------|-------|-------|-------|
| M0R757 | Elongation factor 1-alpha                          | 0.17% | 0.26% | 0.10% | 0.27% | 0.08% | 0.26% |
| O35355 | Guanine nucleotide-binding protein subunit gamma   | 0.72% | 0.46% | 0.50% | 0.67% |       | 0.58% |
| P50399 | Rab GDP dissociation inhibitor beta                | 0.11% | 0.07% |       | 0.07% | 0.06% | 0.08% |
| Q5XI73 | Rho GDP-dissociation inhibitor 1                   | 0.61% | 0.70% | 0.34% | 0.53% | 0.35% | 0.65% |
| Q66H11 | GTP-binding nuclear protein Ran                    | 0.43% | 0.34% | 0.28% | 0.33% | 0.21% | 0.31% |
| Q6AY18 | SAR1 gene homolog A                                | 0.13% | 0.12% |       | 0.08% |       |       |
| Q99P74 | Ras-related protein Rab-27B                        | 0.08% | 0.11% |       | 0.07% |       | 0.09% |
| P69897 | Tubulin beta-5 chain                               | 0.25% | 0.39% | 0.22% | 0.29% | 0.15% | 0.29% |
| Q04679 | Sodium/potassium-transporting ATPase subunit gamma |       | 0.25% | 0.41% | 0.37% | 0.43% | 0.32% |
| D3ZPN1 | NPR2-like, GATOR1 complex subunit                  |       | 0.04% |       |       |       |       |
| Q5RKJ9 | RAB10, member RAS oncogene family                  | 0.25% | 0.20% | 0.22% | 0.24% | 0.27% | 0.17% |

**Table S7.** List of the proteins related to autophagy.

| Protein IDs | Protein names                        | HA-1d | MHA-1d | HA-4d | MHA-4d | HA-7d | MHA-7d |
|-------------|--------------------------------------|-------|--------|-------|--------|-------|--------|
| B2RYC9      | Glucosylceramidase                   |       | 0.05%  | 0.10% | 0.12%  | 0.14% | 0.11%  |
| F8V328      | RAB8                                 | 0.28% | 0.23%  | 0.29% | 0.22%  | 0.26% | 0.19%  |
| M0RCB1      | Uncharacterized protein              | 0.62% | 0.66%  | 0.53% | 0.50%  | 0.53% | 0.53%  |
| Q63769      | Sushi repeat-containing protein SRPX | 0.04% | 0.04%  | 0.08% | 0.07%  | 0.12% | 0.04%  |
| Q6NYB7      | Ras-related protein Rab-1A           | 0.63% | 0.60%  | 0.65% | 0.59%  | 0.64% | 0.57%  |
| P82995      | Heat shock protein HSP 90-alpha      | 0.27% | 0.20%  | 0.28% | 0.26%  | 0.26% | 0.27%  |
| Q6AYS3      | Carboxypeptidase                     | 0.04% | 0.05%  | 0.06% |        | 0.06% | 0.04%  |

**Table S8.** List of the proteins related to endoplasmic reticulum stress.

| Protein IDs | Protein names                             | HA-1d | MHA-1d | HA-4d | MHA-4d | HA-7d | MHA-7d |
|-------------|-------------------------------------------|-------|--------|-------|--------|-------|--------|
| P04785      | Protein disulfide-isomerase               | 0.22% | 0.21%  | 0.21% | 0.19%  | 0.15% | 0.21%  |
| P05197      | Elongation factor 2                       | 0.10% | 0.10%  | 0.10% | 0.14%  | 0.05% | 0.09%  |
| P52555      | Endoplasmic reticulum resident protein 29 |       |        |       | 0.09%  |       | 0.16%  |
| P18418      | Calreticulin                              | 0.14% | 0.11%  | 0.12% | 0.15%  | 0.15% | 0.35%  |

|            |                                       |       |       |       |       |       |       |
|------------|---------------------------------------|-------|-------|-------|-------|-------|-------|
| A0A0G2JSZ5 | Protein disulfide-isomerase A6        | 0.08% | 0.11% | 0.06% | 0.09% | 0.08% | 0.08% |
| A0A0G2KAY8 | Selenoprotein F                       |       |       |       | 0.15% | 0.18% | 0.13% |
| D3ZCH6     | RCG44970                              |       |       |       |       | 0.07% |       |
| F1LVC3     | RAB6B, member RAS oncogene family     | 0.14% | 0.14% | 0.15% | 0.13% | 0.21% | 0.12% |
| P50137     | Transketolase                         | 0.46% | 0.54% | 0.38% | 0.54% | 0.32% | 0.45% |
| Q63083     | Nucleobindin-1                        | 0.07% | 0.17% | 0.33% | 0.40% | 0.29% | 0.31% |
| Q6AY18     | SAR1 gene homolog A                   | 0.13% | 0.12% |       | 0.08% |       |       |
| P24368     | Peptidyl-prolyl cis-trans isomerase B | 0.60% | 0.27% | 0.62% | 0.41% | 0.65% | 0.54% |

**Table S9.** List of the proteins related to ubiquitination.

| Protein IDs | Protein names                                        | HA-1d | MHA-1d | HA-4d | MHA-4d | HA-7d | MHA-7d |
|-------------|------------------------------------------------------|-------|--------|-------|--------|-------|--------|
| A0A0G2JU07  | Ubiquitin-conjugating enzyme E2 variant 2            | 0.29% |        | 0.18% | 0.11%  | 0.13% | 0.18%  |
| F1M2K3      | Small ubiquitin-related modifier                     | 0.35% | 0.25%  | 0.28% | 0.25%  | 0.29% | 0.21%  |
| Q63654      | Polyubiquitin                                        | 0.76% | 0.57%  | 0.79% | 0.79%  | 0.83% | 0.61%  |
| A0A0G2K2A0  | Uncharacterized protein                              | 0.23% |        |       |        |       |        |
| A0A140TAA4  | Programmed cell death 6-interacting protein          |       |        |       | 0.02%  |       | 0.02%  |
| D3ZAS8      | Spliceosome-associated factor 3                      |       | 0.03%  | 0.03% | 0.02%  | 0.03% | 0.02%  |
| D3ZXS8      | Huntingtin interacting protein 2                     | 0.08% |        |       | 0.12%  |       |        |
| D4AC36      | Eukaryotic translation initiation factor 3 subunit F | 0.05% | 0.05%  |       | 0.07%  |       | 0.04%  |
| F1M9Q3      | Listerin E3 ubiquitin protein ligase 1               | 0.02% | 0.02%  | 0.01% | 0.01%  | 0.02% | 0.02%  |
| P06761      | Endoplasmic reticulum chaperone BiP                  | 0.45% | 0.40%  | 0.38% | 0.33%  | 0.41% | 0.24%  |
| P0DMW1      | Heat shock 70 kDa protein 1B                         | 0.27% | 0.25%  | 0.25% | 0.21%  | 0.19% | 0.17%  |
| P18420      | Proteasome subunit alpha type-1                      | 0.16% | 0.19%  | 0.10% | 0.12%  | 0.14% | 0.15%  |
| P40307      | Proteasome subunit beta type-2                       | 0.25% | 0.08%  | 0.26% |        | 0.22% |        |
| P60901      | Proteasome subunit alpha type-6                      | 0.45% | 0.30%  | 0.50% | 0.26%  | 0.53% | 0.33%  |
| Q4KM35      | Proteasome subunit beta type-10                      | 0.10% | 0.06%  | 0.07% |        | 0.07% |        |

|        |                                             |       |       |       |       |       |       |
|--------|---------------------------------------------|-------|-------|-------|-------|-------|-------|
| Q5U300 | Ubiquitin-like modifier-activating enzyme 1 | 0.02% | 0.02% | 0.03% | 0.02% |       | 0.01% |
| Q9JI92 | Syntenin-1                                  | 0.06% |       | 0.24% | 0.08% | 0.29% | 0.12% |
| Q5XIM9 | T-complex protein 1 subunit beta            | 0.10% | 0.03% | 0.09% | 0.06% | 0.07% | 0.05% |
| Q6P9V6 | Proteasome subunit alpha type               | 0.99% | 0.52% | 1.18% | 0.57% | 1.27% | 0.67% |

**Table S10.** List of the proteins related to Calcium ion.

| Protein IDs | Protein names                                     | HA-1d | MHA-1d | HA-4d | MHA-4d | HA-7d | MHA-7d |
|-------------|---------------------------------------------------|-------|--------|-------|--------|-------|--------|
| D3ZZ89      | Triggering receptor expressed on myeloid cells 2  | 0.11% | 0.29%  | 0.32% | 0.32%  | 0.41% | 0.28%  |
| D3ZZS8      | ATPase H <sup>+</sup> -transporting V1 subunit B1 | 0.07% |        | 0.03% |        | 0.03% | 0.03%  |
| P05370      | Glucose-6-phosphate 1-dehydrogenase               | 0.06% | 0.12%  |       | 0.07%  |       | 0.09%  |
| P0DP31      | Calmodulin-3                                      | 0.45% | 0.54%  | 0.58% | 0.63%  | 0.49% | 0.50%  |
| P14844      | C-C motif chemokine 2                             | 0.17% | 0.33%  | 0.24% | 0.32%  | 0.25% | 0.28%  |
| P31044      | Phosphatidylethanolamine-binding protein 1        | 0.14% | 0.22%  | 0.19% | 0.21%  | 0.10% | 0.26%  |
| P50398      | Rab GDP dissociation inhibitor alpha              | 0.11% | 0.09%  | 0.08% | 0.09%  | 0.08% | 0.08%  |
| P62260      | 14-3-3 protein epsilon                            | 0.78% | 0.72%  | 0.78% | 0.61%  | 0.74% | 0.58%  |
| Q07936      | Annexin A2                                        | 0.29% | 0.38%  | 0.31% | 0.37%  | 0.37% | 0.55%  |
| Q10746      | C-X-C motif chemokine 3                           |       |        |       | 0.24%  |       | 0.14%  |
| Q62658      | Peptidyl-prolyl cis-trans isomerase FKBP1A        | 0.40% | 0.31%  |       | 0.37%  | 0.17% | 0.38%  |
| P63259      | Actin, cytoplasmic 2                              | 1.30% | 1.25%  | 1.25% | 1.21%  | 1.31% | 1.04%  |
| A0A0G2K013  | Alpha-actinin-4                                   | 0.08% | 0.09%  | 0.12% | 0.07%  | 0.10% | 0.06%  |
| A0A0G2K6J5  | Myosin light polypeptide 6                        | 0.73% | 0.70%  | 0.58% | 0.47%  | 0.67% | 0.63%  |
| B2GVB1      | Protein S100                                      | 0.57% | 0.55%  | 0.59% | 0.53%  | 0.62% | 0.46%  |
| F1LRC2      | Allograft inflammatory factor 1                   | 0.11% | 0.33%  |       | 0.32%  |       | 0.27%  |
| M0RD20      | Calpain small subunit 1-like                      | 0.11% | 0.25%  | 0.12% | 0.07%  | 0.12% | 0.18%  |
| P05942      | Protein S100-A4                                   | 0.40% | 1.09%  | 0.25% | 0.90%  | 0.17% | 0.71%  |
| Q5RK05      | Matrix Gla protein                                |       |        |       |        | 0.26% | 0.13%  |
| Q7TP46      | Ab2-379                                           |       |        | 0.13% | 0.19%  | 0.19% | 0.23%  |
| Q4FZY0      | EF-hand domain-containing protein D2              | 0.11% | 0.24%  |       | 0.23%  |       | 0.20%  |
| Q63781      | Myosin regulatory light chain                     | 0.43% | 0.55%  | 0.45% | 0.36%  | 0.42% | 0.42%  |
| Q7M079      | Calcium-binding protein 4                         | 1.44% | 0.91%  |       |        |       |        |

|        |                          |       |       |       |
|--------|--------------------------|-------|-------|-------|
| P11030 | Acyl-CoA-binding protein | 0.46% | 0.53% | 0.46% |
|--------|--------------------------|-------|-------|-------|

**Table S11.** List of the proteins related to mitochondrion.

| Protein IDs | Protein names                                   | HA-1d | MHA-1d | HA-4d | MHA-4d | HA-7d | MHA-7d |
|-------------|-------------------------------------------------|-------|--------|-------|--------|-------|--------|
| A0A0G2JSS8  | Peroxiredoxin 5                                 | 0.43% | 0.37%  | 0.27% | 0.36%  | 0.33% | 0.35%  |
| B6DYQ7      | Glutathione S-transferase pi                    | 0.28% | 0.35%  | 0.38% | 0.30%  | 0.26% | 0.26%  |
| F1LP05      | ATP synthase subunit alpha                      |       | 0.08%  |       | 0.06%  | 0.22% | 0.20%  |
| O88767      | Protein/nucleic acid deglycase DJ-1             | 0.33% | 0.46%  | 0.25% | 0.13%  | 0.21% | 0.42%  |
| P05065      | Fructose-bisphosphate aldolase A                | 0.68% | 0.86%  | 0.68% | 0.70%  | 0.55% | 0.74%  |
| P06761      | Endoplasmic reticulum chaperone BiP             | 0.45% | 0.40%  | 0.38% | 0.33%  | 0.41% | 0.24%  |
| P07895      | Superoxide dismutase [Mn]                       | 0.12% | 0.11%  | 0.12% | 0.11%  | 0.13% | 0.09%  |
| P0DP31      | Calmodulin-3                                    | 0.45% | 0.54%  | 0.58% | 0.63%  | 0.49% | 0.50%  |
| P19804      | Nucleoside diphosphate kinase B                 | 0.49% | 0.42%  | 0.40% | 0.31%  | 0.48% | 0.53%  |
| P45592      | Cofilin-1                                       | 1.28% | 1.33%  | 1.07% | 1.29%  | 1.06% | 1.07%  |
| P63102      | 14-3-3 protein zeta/delta                       | 1.20% | 1.18%  | 1.32% | 1.08%  | 1.30% | 1.07%  |
| Q3MIE4      | Synaptic vesicle membrane protein VAT-1 homolog | 0.15% | 0.28%  | 0.23% | 0.29%  | 0.19% | 0.23%  |
| Q6MG61      | Chloride intracellular channel protein 1        | 0.14% | 0.34%  | 0.22% | 0.33%  | 0.23% | 0.40%  |
| Q91W30      | Aldose reductase-like protein                   | 0.24% | 0.23%  | 0.25% | 0.22%  | 0.26% | 0.19%  |
| P07150      | Annexin A1                                      | 0.10% | 0.14%  | 0.05% | 0.21%  |       | 0.26%  |

**Table S12.** List of the proteins related to endosome.

| Protein IDs | Protein names                                               | HA-1d | MHA-1d | HA-4d | MHA-4d | HA-7d | MHA-7d |
|-------------|-------------------------------------------------------------|-------|--------|-------|--------|-------|--------|
| B0BMW0      | RAB14, member RAS oncogene family                           | 0.08% | 0.08%  | 0.12% |        | 0.13% | 0.06%  |
| B2GVB9      | Fermitin family member 3                                    | 0.30% | 0.33%  | 0.27% | 0.33%  | 0.29% | 0.29%  |
| G3V624      | Coronin                                                     | 0.36% | 0.38%  | 0.30% | 0.33%  | 0.23% | 0.32%  |
| G3V7L8      | ATPase, H <sup>+</sup> transporting, V1 subunit E isoform 1 | 0.07% |        |       | 0.07%  |       | 0.09%  |
| Q5U300      | Ubiquitin-like modifier-activating enzyme 1                 | 0.02% | 0.02%  | 0.03% | 0.02%  |       | 0.01%  |
| Q63769      | Sushi repeat-containing protein SRPX                        | 0.04% | 0.04%  | 0.08% | 0.07%  | 0.12% | 0.04%  |

|        |                                                |       |       |       |       |       |       |
|--------|------------------------------------------------|-------|-------|-------|-------|-------|-------|
| Q6NYB7 | Ras-related protein Rab-1A                     | 0.63% | 0.60% | 0.65% | 0.59% | 0.64% | 0.57% |
| Q6P9V7 | Proteasome                                     | 0.20% | 0.19% | 0.21% | 0.19% | 0.18% | 0.13% |
| Q9JHL4 | Drebrin-like protein                           |       |       | 0.04% |       |       |       |
| R4I4V9 | Neutrophil cytosolic factor 2 mutant isoform 2 | 0.03% | 0.03% | 0.04% |       |       | 0.03% |
| Q91ZN1 | Coronin-1A                                     | 0.11% | 0.13% | 0.10% | 0.10% | 0.06% | 0.10% |
| A1L1J8 | RAB5B, member RAS oncogene family              | 0.12% | 0.12% | 0.08% |       | 0.13% | 0.10% |
| Q5RKJ9 | RAB10, member RAS oncogene family              | 0.25% | 0.20% | 0.22% | 0.24% | 0.27% | 0.17% |
| F8V328 | RAB8                                           | 0.28% | 0.23% | 0.29% | 0.22% | 0.26% | 0.19% |

**Table S13.** List of the proteins related to lysosome.

| Protein IDs | Protein names                              | HA-1d | MHA-1d | HA-4d | MHA-4d | HA-7d | MHA-7d |
|-------------|--------------------------------------------|-------|--------|-------|--------|-------|--------|
| A0A0G2K6Z6  | Tartrate-resistant acid phosphatase type 5 |       |        |       | 0.05%  |       | 0.12%  |
| B2GUV5      | V-type proton ATPase subunit G             | 0.42% | 0.27%  | 0.43% | 0.39%  | 0.45% | 0.33%  |
| B2RYC9      | Glucosylceramidase                         |       | 0.05%  | 0.10% | 0.12%  | 0.14% | 0.11%  |
| B2RYP4      | Sorting nexin 2                            | 0.05% |        | 0.05% | 0.03%  |       | 0.04%  |
| D3ZPN1      | NPR2-like, GATOR1 complex subunit          |       | 0.04%  |       |        |       |        |
| D3ZZR3      | Cathepsin S                                | 0.16% | 0.05%  | 0.40% | 0.12%  | 0.56% | 0.25%  |
| F1LQQ8      | Beta-glucuronidase                         |       |        | 0.04% |        | 0.04% |        |
| F1M779      | Clathrin heavy chain                       | 0.03% | 0.02%  | 0.02% | 0.03%  | 0.02% | 0.03%  |
| M0RCB1      | Uncharacterized protein                    | 0.62% | 0.66%  | 0.53% | 0.50%  | 0.53% | 0.53%  |
| O35186      | Cathepsin K                                |       |        | 0.16% | 0.12%  | 0.25% | 0.31%  |
| O35244      | Peroxiredoxin-6                            | 0.31% | 0.33%  | 0.32% | 0.21%  | 0.37% | 0.28%  |
| P04762      | Catalase                                   | 0.03% |        | 0.03% |        |       |        |
| P14841      | Cystatin-C                                 | 0.31% | 0.18%  | 0.38% | 0.34%  | 0.40% | 0.25%  |
| P34058      | Heat shock protein HSP 90-beta             | 0.36% | 0.31%  | 0.34% | 0.36%  | 0.32% | 0.35%  |
| P45479      | Palmitoyl-protein thioesterase 1           |       |        | 0.06% |        | 0.09% | 0.04%  |
| Q5U2V4      | Phospholipase B-like 1                     | 0.03% |        |       | 0.03%  | 0.07% |        |
| Q641X3      | Beta-hexosaminidase subunit alpha          |       |        | 0.05% |        | 0.05% |        |
| Q6AYS3      | Carboxypeptidase                           | 0.04% | 0.05%  | 0.06% |        | 0.06% | 0.04%  |
| Q6IN22      | Cathepsin B                                | 0.38% | 0.46%  | 0.55% | 0.40%  | 0.60% | 0.49%  |
| Q6P6T6      | Cathepsin D                                | 0.28% | 0.37%  | 0.55% | 0.36%  | 0.62% | 0.39%  |
| Q6P7A4      | Prosaposin                                 | 0.40% | 0.48%  | 0.62% | 0.51%  | 0.78% | 0.41%  |
| Q9EPB1      | Dipeptidyl peptidase 2                     | 0.05% |        | 0.04% |        | 0.06% | 0.03%  |
| Q9QZK8      | Deoxyribonuclease-2-                       | 0.07% | 0.05%  | 0.08% | 0.07%  | 0.08% | 0.06%  |

| alpha  |             |       |       |       |  |       |       |
|--------|-------------|-------|-------|-------|--|-------|-------|
| Q9R1T3 | Cathepsin Z | 0.08% | 0.11% | 0.09% |  | 0.18% | 0.18% |

**Table S14.** List of the proteins related to protein endoplasmic reticulum.

| Protein IDs | Protein names                               | HA-1d | MHA-1d | HA-4d | MHA-4d | HA-7d | MHA-7d |
|-------------|---------------------------------------------|-------|--------|-------|--------|-------|--------|
| A0A0A0MY09  | Endoplasmic                                 | 0.11% | 0.13%  | 0.17% | 0.13%  | 0.19% | 0.13%  |
| A0A0G2JSZ5  | Protein disulfide-isomerase A6              | 0.08% | 0.11%  | 0.06% | 0.09%  | 0.08% | 0.08%  |
| A0A0G2KAY8  | Selenoprotein F                             |       |        |       | 0.15%  | 0.18% | 0.13%  |
| A0A140TAA4  | Programmed cell death 6-interacting protein |       |        |       | 0.02%  |       | 0.02%  |
| F1LQS6      | RCG61833                                    | 0.02% |        | 0.02% |        | 0.02% | 0.01%  |
| P04785      | Protein disulfide-isomerase                 | 0.22% | 0.21%  | 0.21% | 0.19%  | 0.15% | 0.21%  |
| P06762      | Heme oxygenase 1                            |       | 0.08%  |       |        |       |        |
| P11030      | Acyl-CoA-binding protein                    |       | 0.46%  |       | 0.53%  |       | 0.46%  |
| P14480      | Fibrinogen beta chain                       | 0.40% | 0.39%  | 0.35% | 0.38%  | 0.30% | 0.31%  |
| P14844      | C-C motif chemokine 2                       | 0.17% | 0.33%  | 0.24% | 0.32%  | 0.25% | 0.28%  |
| P24368      | Peptidyl-prolyl cis-trans isomerase B       | 0.60% | 0.27%  | 0.62% | 0.41%  | 0.65% | 0.54%  |
| P31044      | Phosphatidylethanolamine-binding protein 1  | 0.14% | 0.22%  | 0.19% | 0.21%  | 0.10% | 0.26%  |
| P37377      | Alpha-synuclein                             |       | 0.50%  |       | 0.36%  |       | 0.37%  |
| P46462      | Transitional endoplasmic reticulum ATPase   | 0.28% | 0.13%  | 0.13% | 0.12%  | 0.09% | 0.13%  |
| P50137      | Transketolase                               | 0.46% | 0.54%  | 0.38% | 0.54%  | 0.32% | 0.45%  |
| P52555      | Endoplasmic reticulum resident protein 29   |       |        |       | 0.09%  |       | 0.16%  |
| Q63083      | Nucleobindin-1                              | 0.07% | 0.17%  | 0.33% | 0.40%  | 0.29% | 0.31%  |
| Q9Z0V5      | Peroxiredoxin-4                             | 0.21% | 0.21%  | 0.32% | 0.26%  | 0.20% | 0.22%  |
| P18418      | Calreticulin                                | 0.14% | 0.11%  | 0.12% | 0.15%  | 0.15% | 0.35%  |

**Table S15.** List of the proteins related to trans-Golgi network.

| Protein IDs | Protein names                        | HA-1d | MHA-1d | HA-4d | MHA-4d | HA-7d | MHA-7d |
|-------------|--------------------------------------|-------|--------|-------|--------|-------|--------|
| D4A8G5      | Transforming growth factor           | 0.04% | 0.11%  | 0.07% | 0.11%  | 0.04% | 0.09%  |
| F1LP82      | Ras-related protein Rab-2A           | 0.12% | 0.12%  | 0.13% | 0.12%  | 0.14% | 0.07%  |
| F1LVC3      | RAB6B, member RAS oncogene family    | 0.14% | 0.14%  | 0.15% | 0.13%  | 0.21% | 0.12%  |
| P02454      | Collagen alpha-1(I) chain            | 0.10% | 0.05%  | 0.38% | 0.29%  | 0.43% | 0.28%  |
| P50398      | Rab GDP dissociation inhibitor alpha | 0.11% | 0.09%  | 0.08% | 0.09%  | 0.08% | 0.08%  |
| P50399      | Rab GDP dissociation inhibitor beta  | 0.11% | 0.07%  |       | 0.07%  | 0.06% | 0.08%  |

|        |                             |       |       |       |       |       |       |
|--------|-----------------------------|-------|-------|-------|-------|-------|-------|
| Q5M7X1 | Coatomer subunit beta'      | 0.04% |       | 0.03% | 0.02% | 0.02% | 0.02% |
| Q5PPP1 | Clathrin light chain        |       |       | 0.08% |       |       | 0.06% |
| Q6AY18 | SAR1 gene homolog A         | 0.13% | 0.12% |       | 0.08% |       |       |
| Q99P74 | Ras-related protein Rab-27B | 0.08% | 0.11% |       | 0.07% |       | 0.09% |

**Table S16.** List of the proteins related to cytoskeleton.

| Protein IDs | Protein names                                                 | HA-1d | MHA-1d | HA-4d | MHA-4d | HA-7d | MHA-7d |
|-------------|---------------------------------------------------------------|-------|--------|-------|--------|-------|--------|
| A0A0G2JUG1  | Uncharacterized protein                                       | 0.18% | 0.22%  | 0.15% | 0.17%  | 0.16% | 0.16%  |
| A0A0H2UHM7  | Tubulin alpha chain                                           | 0.34% | 0.37%  | 0.36% | 0.34%  | 0.31% | 0.31%  |
| A0A1W2Q6E9  | Moesin                                                        | 0.36% | 0.38%  | 0.34% | 0.27%  | 0.29% | 0.31%  |
| B0BNA5      | Coactosin-like protein                                        | 0.36% | 0.34%  | 0.31% | 0.33%  | 0.26% | 0.29%  |
| B2GUZ5      | F-actin-capping protein subunit alpha-1                       | 0.32% | 0.17%  | 0.18% | 0.08%  | 0.16% | 0.23%  |
| B2GV73      | Actin-related protein 2/3 complex subunit 3                   | 0.14% | 0.09%  | 0.10% | 0.09%  | 0.15% | 0.08%  |
| C0KUC5      | LIM and senescent cell antigen-like-containing domain protein | 0.14% | 0.11%  | 0.14% | 0.08%  | 0.10% | 0.09%  |
| D3ZRX9      | Calponin                                                      | 0.24% | 0.23%  | 0.12% | 0.18%  | 0.21% | 0.16%  |
| D3ZXS8      | Huntingtin interacting protein 2                              | 0.08% |        |       | 0.12%  |       |        |
| D4A8F2      | Ras suppressor protein 1                                      | 0.33% | 0.35%  | 0.35% | 0.25%  | 0.26% | 0.37%  |
| D4AA54      | Pleckstrin homology, MyTH4 and FERM domain-containing H1      | 0.02% | 0.02%  | 0.02% | 0.02%  | 0.02% | 0.02%  |
| D4ACB8      | Chaperonin subunit 8                                          | 0.13% | 0.06%  | 0.12% | 0.09%  | 0.05% | 0.06%  |
| G3V6P7      | Myosin, heavy polypeptide 9                                   | 0.13% | 0.10%  | 0.10% | 0.07%  | 0.07% | 0.10%  |
| G3V7C6      | Tubulin beta chain                                            | 0.28% | 0.33%  | 0.23% | 0.23%  | 0.17% | 0.28%  |
| G3V852      | RCG55135                                                      | 0.61% | 0.62%  | 0.59% | 0.58%  | 0.55% | 0.55%  |
| G3V8C3      | Vimentin                                                      | 1.13% | 1.19%  | 1.16% | 1.07%  | 1.31% | 1.05%  |
| M0R8A4      | Uncharacterized protein                                       |       |        |       |        |       | 0.08%  |
| O08727      | Tumor necrosis factor receptor superfamily member 11B         |       |        |       |        | 0.07% |        |
| P04797      | Glyceraldehyde-3-phosphate dehydrogenase                      | 0.77% | 0.71%  | 0.66% | 0.64%  | 0.72% | 0.58%  |
| P09495      | Tropomyosin alpha-4 chain                                     | 1.07% | 0.99%  | 1.14% | 0.96%  | 0.98% | 0.96%  |
| P47942      | Dihydropyrimidinase-related protein 2                         | 0.18% | 0.12%  | 0.17% | 0.07%  | 0.13% | 0.10%  |
| P52944      | PDZ and LIM domain protein 1                                  | 0.08% | 0.08%  | 0.08% | 0.07%  | 0.09% | 0.06%  |

|        |                                                             |       |       |       |       |       |       |
|--------|-------------------------------------------------------------|-------|-------|-------|-------|-------|-------|
| P60711 | Actin, cytoplasmic 1                                        | 1.32% | 1.31% | 1.30% | 1.27% | 1.38% | 1.10% |
| P61589 | Transforming protein RhoA                                   | 0.31% | 0.25% | 0.23% | 0.20% | 0.19% | 0.18% |
| P62329 | Thymosin beta-4                                             | 2.07% | 2.16% | 1.95% | 1.76% | 2.04% | 1.50% |
| P63004 | Platelet-activating factor acetylhydrolase IB subunit alpha | 0.06% |       | 0.06% |       | 0.04% |       |
| P63259 | Actin, cytoplasmic 2                                        | 1.30% | 1.25% | 1.25% | 1.21% | 1.31% | 1.04% |
| P68136 | Actin, alpha skeletal muscle                                | 0.68% | 0.65% | 0.85% | 0.72% | 0.83% | 0.60% |
| P68370 | Tubulin alpha-1A chain                                      | 0.42% | 0.42% | 0.45% | 0.41% | 0.39% | 0.29% |
| P69897 | Tubulin beta-5 chain                                        | 0.25% | 0.39% | 0.22% | 0.29% | 0.15% | 0.29% |
| P70482 | Lamin C2                                                    | 0.11% | 0.10% | 0.11% | 0.22% | 0.18% | 0.19% |
| P85108 | Tubulin beta-2A chain                                       | 0.23% | 0.33% | 0.20% | 0.21% | 0.14% | 0.24% |
| Q08163 | Adenylyl cyclase-associated protein 1                       | 0.53% | 0.50% | 0.34% | 0.46% | 0.42% | 0.44% |
| Q3T1K5 | F-actin-capping protein subunit alpha-2                     | 0.55% | 0.50% | 0.27% | 0.35% | 0.12% | 0.35% |
| Q4KLF8 | Actin-related protein 2/3 complex subunit 5                 |       | 0.33% |       | 0.16% |       | 0.33% |
| Q5M7U6 | Actin-related protein 2                                     | 0.28% | 0.22% | 0.31% | 0.18% | 0.30% | 0.24% |
| Q5RKI0 | WD repeat-containing protein 1                              | 0.04% | 0.08% | 0.07% | 0.09% | 0.09% | 0.06% |
| Q5XI04 | RCG45489                                                    | 0.06% |       |       |       | 0.07% |       |
| Q5XI32 | F-actin-capping protein subunit beta                        | 0.34% | 0.27% | 0.29% | 0.32% | 0.34% | 0.27% |
| Q5XI38 | Lymphocyte cytosolic protein 1                              | 0.20% | 0.40% | 0.17% | 0.42% | 0.16% | 0.46% |
| Q5XIF6 | Tubulin alpha-4A chain                                      | 0.30% | 0.31% | 0.26% | 0.28% | 0.21% | 0.26% |
| Q5XIM9 | T-complex protein 1 subunit beta                            |       | 0.03% | 0.09% | 0.06% | 0.07% | 0.05% |
| Q63610 | Tropomyosin alpha-3 chain                                   | 1.21% | 1.32% | 1.22% | 1.16% | 0.92% | 1.08% |
| Q66H98 | Caveolae-associated protein 2                               | 0.04% | 0.06% | 0.06% | 0.06% | 0.07% | 0.05% |
| Q66HR2 | Microtubule-associated protein RP/EB family member 1        | 0.19% | 0.09% | 0.16% |       | 0.14% | 0.08% |
| Q68FP1 | Gelsolin                                                    | 0.30% | 0.30% | 0.30% | 0.26% | 0.30% | 0.23% |
| Q6AYC4 | Macrophage-capping protein                                  | 0.29% | 0.38% | 0.26% | 0.43% | 0.21% | 0.32% |
| Q6IFV5 | Keratin 36                                                  | 0.05% | 0.05% | 0.08% | 0.07% | 0.08% | 0.04% |
| Q6P9V9 | Tubulin alpha-1B chain                                      | 0.42% | 0.42% | 0.45% | 0.39% | 0.39% | 0.31% |
| Q7M0E3 | Destrin                                                     | 0.36% | 0.35% | 0.21% | 0.33% | 0.17% | 0.29% |

|        |                                   |       |       |       |       |       |       |
|--------|-----------------------------------|-------|-------|-------|-------|-------|-------|
| Q7TPB1 | T-complex protein 1 subunit delta | 0.11% | 0.05% | 0.05% | 0.08% | 0.04% | 0.08% |
| Q99J82 | Integrin-linked protein kinase    | 0.22% | 0.20% | 0.23% | 0.14% | 0.26% | 0.16% |
| Q99MZ8 | LIM and SH3 domain protein 1      | 0.16% | 0.12% |       | 0.09% |       | 0.10% |
| Q9JI92 | Syntenin-1                        | 0.06% |       | 0.24% | 0.08% | 0.29% | 0.12% |
| Q9Z1Z9 | PDZ and LIM domain protein 7      |       | 0.05% |       | 0.05% |       | 0.05% |

**Table S17.** List of the proteins related to cell surface.

| Protein IDs | Protein names                                                    | HA-1d | MHA-1d | HA-4d | MHA-4d | HA-7d | MHA-7d |
|-------------|------------------------------------------------------------------|-------|--------|-------|--------|-------|--------|
| A0A0G2JWK0  | Integrin beta                                                    | 0.03% |        |       |        | 0.05% | 0.06%  |
| A0A0G2K4I8  | Uncharacterized protein                                          | 0.22% | 0.22%  | 0.23% | 0.21%  | 0.24% | 0.18%  |
| A0A0G2K4X1  | RT1 class Ia, locus A1                                           | 0.14% | 0.11%  | 0.25% | 0.24%  | 0.23% | 0.19%  |
| A0A0G2K7S9  | Uncharacterized protein                                          | 0.22% |        |       |        | 0.16% |        |
| A0A0H2UHM5  | Protein disulfide-isomerase                                      | 0.18% | 0.19%  | 0.16% | 0.12%  | 0.13% | 0.24%  |
| C0JPT7      | Filamin A                                                        | 0.55% | 0.55%  | 0.46% | 0.51%  | 0.47% | 0.42%  |
| D3ZE00      | Uncharacterized protein                                          | 0.26% | 0.25%  | 0.27% | 0.24%  | 0.29% | 0.21%  |
| D3ZMS5      | T-cell lymphoma invasion and metastasis 2                        | 0.01% | 0.01%  | 0.02% | 0.01%  | 0.02% | 0.01%  |
| D3ZQ45      | Desmoglein 1                                                     | 0.03% | 0.03%  | 0.04% | 0.03%  | 0.04% | 0.02%  |
| D3ZY51      | Plakophilin 1                                                    |       |        |       |        |       | 0.02%  |
| F1LM84      | Nidogen-1                                                        |       |        | 0.03% |        | 0.05% | 0.02%  |
| F1LMV6      | Desmoplakin                                                      | 0.05% | 0.05%  | 0.04% | 0.01%  | 0.02% | 0.04%  |
| F1LTJ5      | Uncharacterized protein                                          |       |        | 0.02% |        | 0.04% |        |
| F1LXY6      | Uncharacterized protein                                          | 0.25% | 0.24%  | 0.26% | 0.24%  | 0.28% | 0.13%  |
| F1M0U4      | Uncharacterized protein                                          | 0.21% | 0.20%  | 0.22% | 0.20%  | 0.23% | 0.17%  |
| F1M7X3      | Cadherin 13                                                      | 0.07% | 0.03%  | 0.06% | 0.03%  | 0.06% | 0.03%  |
| G3V6D3      | ATP synthase subunit beta                                        | 0.05% | 0.10%  | 0.12% | 0.05%  | 0.16% | 0.09%  |
| M0R692      | Uncharacterized protein                                          | 0.26% | 0.25%  | 0.27% | 0.24%  | 0.28% | 0.21%  |
| P00507      | Aspartate aminotransferase, mitochondria                         |       |        | 0.04% |        | 0.07% | 0.05%  |
| P30121      | Metalloproteinase inhibitor 2                                    | 0.35% | 0.49%  | 0.61% | 0.65%  | 0.76% | 0.75%  |
| P54311      | Guanine nucleotide-binding protein G(I)/G(S)/G(T) subunit beta-1 | 0.23% | 0.15%  | 0.21% | 0.14%  | 0.25% | 0.08%  |
| P70565      | Plakoglobin                                                      | 0.02% | 0.08%  | 0.02% | 0.02%  |       | 0.07%  |
| P82995      | Heat shock protein HSP                                           | 0.27% | 0.20%  | 0.28% | 0.26%  | 0.26% | 0.27%  |

|        |                                                                        |       |       |       |       |       |       |
|--------|------------------------------------------------------------------------|-------|-------|-------|-------|-------|-------|
|        | 90-alpha                                                               |       |       |       |       |       |       |
| Q06000 | Lipoprotein lipase                                                     | 0.11% | 0.21% | 0.17% | 0.17% | 0.17% | 0.17% |
| Q07936 | Annexin A2                                                             | 0.29% | 0.38% | 0.31% | 0.37% | 0.37% | 0.55% |
| Q0V8T5 | Contactin-associated protein like 5-2                                  |       |       |       | 0.04% |       | 0.03% |
| Q3KR76 | Plasminogen activator, urokinase                                       | 0.14% | 0.38% | 0.27% | 0.41% | 0.34% | 0.45% |
| Q3T1J1 | Eukaryotic translation initiation factor 5A-1                          | 0.34% | 0.33% | 0.29% | 0.32% | 0.31% | 0.27% |
| Q4FZY0 | EF-hand domain-containing protein D2                                   | 0.11% | 0.24% |       | 0.23% |       | 0.20% |
| Q5BKC4 | C9 protein                                                             | 0.04% | 0.04% | 0.05% | 0.04% | 0.05% | 0.04% |
| Q62611 | Interleukin-1 receptor-like 1                                          |       |       |       | 0.07% | 0.06% | 0.08% |
| Q62636 | Ras-related protein Rap-1b                                             | 1.00% | 0.79% | 1.04% | 0.76% | 0.94% | 0.70% |
| Q63691 | Monocyte differentiation antigen CD14                                  |       |       |       | 0.07% |       | 0.17% |
| Q6P6Q5 | Amyloid-beta A4 protein                                                | 0.10% | 0.06% | 0.07% | 0.05% | 0.11% | 0.06% |
| Q8CFN2 | Cell division control protein 42 homolog                               | 0.31% | 0.30% | 0.33% | 0.29% | 0.24% | 0.29% |
| Q95567 | Mature alpha chain of major histocompatibility complex class I antigen | 0.15% | 0.12% | 0.25% | 0.25% | 0.24% | 0.20% |
| Q9JI30 | Integrin beta 2 alpha subunit                                          |       |       | 0.02% | 0.01% | 0.05% | 0.03% |
| R9PXU6 | Vinculin                                                               | 0.66% | 0.82% | 0.53% | 0.71% | 0.52% | 0.68% |
| D3ZK14 | Tenascin N                                                             |       | 0.02% | 0.31% | 0.13% | 0.34% | 0.22% |
| Q6P9V1 | Tetraspanin                                                            |       |       |       | 0.07% |       | 0.06% |

**Table S18.** List of the proteins related to extracellular space.

| Protein IDs | Protein names                           | HA-1d | MHA-1d | HA-4d | MHA-4d | HA-7d | MHA-7d |
|-------------|-----------------------------------------|-------|--------|-------|--------|-------|--------|
| A0A0G2K0M4  | Uncharacterized protein                 | 0.28% | 0.27%  | 0.29% | 0.26%  | 0.30% | 0.23%  |
| A0A0G2K0N6  | Uncharacterized protein                 | 0.18% | 0.17%  | 0.18% | 0.17%  | 0.29% | 0.21%  |
| A0A0G2K4X1  | RT1 class Ia, locus A1                  | 0.14% | 0.11%  | 0.25% | 0.24%  | 0.23% | 0.19%  |
| A0A0G2K531  | Glutathione peroxidase                  |       | 0.22%  | 0.23% | 0.14%  | 0.24% | 0.36%  |
| A0A0G2K8K3  | Heparin cofactor 2                      | 0.13% | 0.14%  | 0.14% | 0.12%  | 0.12% | 0.12%  |
| A0A0G2KAJ7  | Collagen alpha-1(XII) chain             |       |        | 0.06% |        | 0.10% | 0.04%  |
| A0A0H2UHA1  | Mannan-binding lectin serine protease 1 | 0.07% | 0.07%  | 0.07% | 0.07%  | 0.08% | 0.06%  |
| A0A0H2UHE2  | Interleukin-1                           |       | 0.10%  |       | 0.15%  |       | 0.13%  |
| A0A0H2UHK1  | Complement C1q subcomponent subunit C   | 0.15% | 0.17%  | 0.45% | 0.31%  | 0.43% | 0.35%  |

|            |                                                          |       |       |       |       |       |       |
|------------|----------------------------------------------------------|-------|-------|-------|-------|-------|-------|
| A0A0H2UHM3 | Haptoglobin                                              | 0.15% | 0.14% | 0.15% | 0.14% | 0.16% | 0.12% |
| A0A0H2UHR6 | Coagulation factor X                                     | 0.26% | 0.25% | 0.16% | 0.16% | 0.19% | 0.17% |
| A0A3B0J380 | Adiponectin c                                            | 0.28% | 0.10% | 0.44% | 0.23% | 0.46% | 0.34% |
| A1L114     | Fga protein                                              | 0.16% | 0.15% | 0.18% | 0.18% | 0.15% | 0.14% |
| A2VD04     | Habp2 protein                                            | 0.10% | 0.10% | 0.09% | 0.08% | 0.09% | 0.04% |
| B2LYI9     | Tenascin C                                               | 0.13% | 0.12% | 0.33% | 0.34% | 0.41% | 0.33% |
| D3ZAA3     | Latent-transforming growth factor beta-binding protein 1 | 0.01% | 0.01% | 0.01% |       | 0.01% |       |
| D3ZPI8     | Complement C8 gamma chain                                | 0.10% | 0.15% |       |       |       | 0.08% |
| D3ZYK8     | Matrix metalloproteinase 9                               |       | 0.02% | 0.26% | 0.44% | 0.25% | 0.41% |
| D4A1T6     | Complement C1r                                           | 0.05% | 0.06% | 0.09% | 0.06% | 0.08% | 0.05% |
| D4A3E0     | Multimerin 1                                             | 0.02% | 0.02% |       | 0.02% |       |       |
| E9PSM5     | 72 kDa type IV collagenase                               |       |       | 0.12% | 0.12% | 0.11% | 0.14% |
| F1M8F5     | Similar to BC049975 protein                              | 0.06% | 0.06% | 0.04% | 0.06% | 0.07% | 0.05% |
| F1M983     | Complement factor H                                      | 0.08% | 0.13% | 0.27% | 0.26% | 0.31% | 0.27% |
| F1M9B2     | Insulin-like growth factor binding protein 7             |       |       |       | 0.37% |       | 0.32% |
| F1MAA7     | Laminin subunit gamma 1                                  |       |       | 0.02% |       | 0.03% |       |
| G3V6K1     | Transcobalamin 2                                         |       | 0.17% |       | 0.35% |       | 0.35% |
| G3V6X1     | Fibulin 2                                                |       |       | 0.14% |       | 0.16% | 0.02% |
| G3V7N9     | Adiponectin a                                            | 0.21% |       | 0.33% | 0.20% | 0.35% | 0.34% |
| H6X338     | Pentaxin                                                 | 0.14% | 0.21% | 0.11% | 0.20% | 0.16% | 0.17% |
| M0RBJ7     | Complement C3                                            | 0.14% | 0.15% | 0.19% | 0.12% | 0.18% | 0.12% |
| M0RDZ5     | Uncharacterized protein                                  | 0.55% | 0.52% | 0.48% | 0.51% | 0.40% | 0.44% |
| O08591     | Perlecan                                                 |       |       | 0.40% |       | 0.42% |       |
| O08628     | Procollagen C-endopeptidase enhancer 1                   | 0.09% | 0.09% | 0.32% | 0.41% | 0.47% | 0.40% |
| O70513     | Galectin-3-binding protein                               |       |       | 0.06% | 0.07% | 0.06% | 0.07% |
| O70598     | Collagen alpha 2 type V                                  |       |       | 0.12% |       | 0.13% | 0.09% |
| P01041     | Cystatin-B                                               | 0.25% | 0.16% | 0.26% | 0.32% | 0.28% | 0.41% |
| P06238     | Alpha-2-macroglobulin                                    | 0.03% | 0.03% | 0.04% | 0.03% | 0.04% | 0.03% |
| P03957     | Stromelysin-1                                            |       |       |       |       |       | 0.07% |
| P07943     | Aldose reductase                                         | 0.16% | 0.08% | 0.11% | 0.07% | 0.09% | 0.06% |
| P10111     | Peptidyl-prolyl cis-trans isomerase A                    | 0.64% | 0.66% | 0.66% | 0.54% | 0.58% | 0.42% |
| P11232     | Thioredoxin (Trx)                                        | 0.49% | 0.47% | 0.59% | 0.61% | 0.53% | 0.39% |
| P11762     | Galectin-1                                               | 0.45% | 0.74% | 0.40% | 0.77% | 0.21% | 0.77% |
| P13941     | Collagen alpha-1(III) chain                              |       |       | 0.17% | 0.06% | 0.21% | 0.10% |

|        |                                                 |       |       |       |       |       |       |
|--------|-------------------------------------------------|-------|-------|-------|-------|-------|-------|
| P14630 | Apolipoprotein M                                | 0.13% | 0.13% | 0.14% | 0.08% | 0.14% | 0.11% |
| P20059 | Hemopexin                                       | 0.13% | 0.11% | 0.13% | 0.10% | 0.14% | 0.10% |
| P20961 | Plasminogen activator inhibitor 1               | 0.25% | 0.47% | 0.26% | 0.51% | 0.23% | 0.44% |
| P30120 | Metalloproteinase inhibitor 1                   |       |       | 0.08% | 0.07% | 0.09% | 0.10% |
| P32038 | Complement factor D                             |       | 0.10% | 0.07% | 0.16% |       | 0.14% |
| P38983 | 40S ribosomal protein SA                        | 0.26% | 0.19% | 0.24% | 0.24% | 0.25% | 0.16% |
| P47853 | Biglycan                                        | 0.11% |       | 0.43% | 0.06% | 0.42% | 0.26% |
| P51886 | Lumican                                         | 0.10% | 0.07% | 0.08% | 0.25% | 0.22% | 0.38% |
| P55053 | Fatty acid-binding protein 5                    | 0.63% | 0.61% | 0.33% | 0.41% | 0.27% | 0.61% |
| P55314 | Complement component C8 beta chain              | 0.03% | 0.06% | 0.06% | 0.07% | 0.05% | 0.05% |
| Q01177 | Plasminogen                                     | 0.09% | 0.09% | 0.10% | 0.09% | 0.10% | 0.08% |
| Q10746 | C-X-C motif chemokine 3                         |       |       |       | 0.24% |       | 0.14% |
| Q5FVN3 | Ccl9-like protein                               |       |       |       | 0.14% |       | 0.11% |
| Q5M7T5 | Serine (Or cysteine) peptidase inhibitor        | 0.35% | 0.38% | 0.40% | 0.29% | 0.41% | 0.34% |
| Q5M7T7 | Platelet-activating factor acetylhydrolase      | 0.27% | 0.26% | 0.42% | 0.43% | 0.52% | 0.37% |
| Q5RK05 | Matrix Gla protein                              |       |       |       |       | 0.26% | 0.13% |
| Q5RK13 | Igf1 protein                                    |       | 0.19% |       | 0.19% |       | 0.16% |
| Q5XI73 | Rho GDP-dissociation inhibitor 1                | 0.61% | 0.70% | 0.34% | 0.53% | 0.35% | 0.65% |
| Q62975 | Protein Z-dependent protease inhibitor          |       | 0.04% | 0.04% |       |       | 0.03% |
| Q63265 | Rat insulin-like growth factor II               | 0.33% | 0.32% | 0.17% | 0.31% | 0.12% | 0.26% |
| Q641Z7 | Acid sphingomyelinase-like phosphodiesterase 3a | 0.06% |       | 0.16% |       | 0.19% | 0.08% |
| Q68FP3 | C-C motif chemokine 6                           |       |       |       | 0.14% |       |       |
| Q6AXS4 | Renin receptor                                  |       | 0.16% |       | 0.29% | 0.08% | 0.33% |
| Q6AXU5 | C-X-C motif chemokine 16                        |       |       |       |       |       | 0.06% |
| Q6GMN4 | Macrophage colony-stimulating factor 1          | 0.05% | 0.06% | 0.08% | 0.09% | 0.07% | 0.04% |
| Q6IN11 | Connective tissue growth factor                 |       |       | 0.06% |       | 0.10% | 0.05% |
| Q6LDF9 | Insulin-like growth factor binding protein 2    |       | 0.14% |       | 0.09% |       | 0.08% |
| Q6MG90 | Complement C4B                                  | 0.11% | 0.14% | 0.12% | 0.12% | 0.11% | 0.10% |
| Q6P734 | Plasma protease C1 inhibitor                    | 0.05% | 0.05% | 0.04% | 0.08% | 0.06% | 0.10% |

|            |                                |       |       |       |       |       |       |
|------------|--------------------------------|-------|-------|-------|-------|-------|-------|
| R9PXT7     | Macrophage metalloelastase     |       |       |       |       |       | 0.19% |
| Q9WUH8     | Fibrillin-1                    |       |       |       |       | 0.01% | 0.01% |
| Q9QZK5     | Serine protease HTRA1          | 0.07% | 0.04% | 0.19% | 0.19% | 0.22% | 0.22% |
| Q9QXY8     | C-C motif chemokine 7          |       |       |       |       |       | 0.14% |
| Q8CIP8     | Complement component C2        | 0.11% | 0.10% | 0.16% | 0.23% | 0.18% | 0.22% |
| Q6P7S6     | Clusterin                      | 0.11% | 0.09% | 0.12% | 0.10% | 0.12% | 0.09% |
| Q6PAH0     | Apolipoprotein E               | 1.43% | 1.76% | 2.07% | 1.95% | 2.13% | 1.69% |
| Q71D11     | Dermcidin                      | 0.76% | 0.57% | 0.79% | 0.63% | 0.82% | 0.54% |
| Q71SA3     | Thrombospondin 1               | 0.36% | 0.39% | 0.52% | 0.39% | 0.57% | 0.38% |
| Q7TMC7     | Ab2-417                        | 0.10% | 0.08% | 0.25% | 0.07% | 0.27% | 0.07% |
| Q80ZA3     | Alpha-2 antiplasmin            | 0.16% | 0.22% | 0.53% | 0.50% | 0.51% | 0.46% |
| Q91YB6     | Complement inhibitory factor H | 0.06% | 0.11% | 0.26% | 0.25% | 0.29% | 0.27% |
| Q99J86     | Attractin                      | 0.10% | 0.11% | 0.09% | 0.10% | 0.12% | 0.09% |
| A0A0U1RRP9 | Complement factor B            | 0.06% | 0.05% | 0.06% | 0.09% | 0.07% | 0.08% |
| D3ZWD6     | Complement C8 alpha chain      | 0.04% | 0.04% | 0.04% | 0.04% | 0.03% | 0.03% |
| P07151     | Beta-2-microglobulin           | 0.21% | 0.33% | 0.15% | 0.39% | 0.23% | 0.33% |
| Q5XIE8     | Integral membrane protein 2B   |       |       | 0.10% | 0.15% |       | 0.10% |
| P10683     | Galanin peptides               |       |       |       |       |       | 0.17% |

**Table S19.** List of the proteins related to synaptic vesicle.

| Protein IDs | Protein names                                            | HA-1d | MHA-1d | HA-4d | MHA-4d | HA-7d | MHA-7d |
|-------------|----------------------------------------------------------|-------|--------|-------|--------|-------|--------|
| D3ZAS8      | Spliceosome-associated factor 3, U4/U6 recycling protein |       | 0.03%  | 0.03% | 0.02%  | 0.03% | 0.02%  |
| F1LMW7      | Myristoylated alanine-rich C-kinase substrate            | 0.13% | 0.15%  | 0.10% | 0.12%  |       | 0.08%  |
| P06765      | Platelet factor 4                                        | 0.33% | 0.49%  | 0.35% | 0.39%  | 0.46% | 0.54%  |
| P16975      | SPARC                                                    | 0.17% | 0.13%  | 0.23% | 0.05%  | 0.27% | 0.18%  |
| P28480      | T-complex protein 1 subunit alpha                        | 0.05% |        |       | 0.03%  |       |        |
| P61983      | 14-3-3 protein gamma                                     | 0.60% | 0.61%  | 0.70% | 0.47%  | 0.66% | 0.51%  |
| P85515      | Alpha-centractin                                         | 0.04% |        |       |        |       |        |
| Q32Q06      | AP-1 complex subunit mu-1                                | 0.04% |        | 0.06% | 0.05%  |       | 0.03%  |
| Q5U1Y2      | Rac family small GTPase 2                                | 0.31% | 0.34%  | 0.23% | 0.33%  | 0.19% | 0.32%  |

**Table S20.** List of the proteins related to cytosol cytoplasm.

| Protein IDs | Protein names | HA-1d | MHA-1d | HA-4d | MHA-4d | HA-7d | MHA-7d |
|-------------|---------------|-------|--------|-------|--------|-------|--------|
|-------------|---------------|-------|--------|-------|--------|-------|--------|

|            |                                                                |       |       |       |       |       |       |
|------------|----------------------------------------------------------------|-------|-------|-------|-------|-------|-------|
| A0A0G2JTS3 | Vacuolar protein sorting-associated protein 29                 | 0.12% |       |       | 0.07% |       | 0.06% |
| A0A0G2K064 | Tyrosine-protein phosphatase non-receptor type                 | 0.06% |       | 0.03% |       | 0.03% | 0.03% |
| A0A0G2K2J1 | Arp2/3 complex 34 kDa subunit                                  | 0.31% | 0.40% | 0.32% | 0.19% | 0.34% | 0.29% |
| A0A0G2K3Z9 | Uncharacterized protein                                        | 0.90% | 1.11% | 0.76% | 1.00% | 0.75% | 0.76% |
| A0A0G2K737 | Thioredoxin-like protein 1                                     | 0.15% | 0.08% | 0.18% | 0.11% | 0.09% | 0.07% |
| B2RZ72     | Actin-related protein 2/3 complex subunit 4                    | 0.34% | 0.23% | 0.30% | 0.27% | 0.31% | 0.31% |
| C9WPN6     | Eukaryotic translation initiation factor 2 subunit 3, Y-linked | 0.06% | 0.05% | 0.06% |       | 0.06% | 0.03% |
| D3ZCH6     | RCG44970                                                       |       |       |       |       | 0.07% |       |
| D4A133     | ATPase H <sup>+</sup> -transporting V1 subunit A               | 0.08% | 0.08% | 0.09% | 0.05% | 0.08% | 0.06% |
| F1LRV4     | Heat shock 70 kDa protein 4                                    | 0.06% | 0.04% | 0.04% | 0.03% | 0.05% | 0.03% |
| F1M9Q3     | Listerin E3 ubiquitin protein ligase 1                         | 0.02% | 0.02% | 0.01% | 0.01% | 0.02% | 0.02% |
| F1M9V7     | Aminopeptidase                                                 | 0.02% | 0.03% | 0.03% | 0.02% | 0.02% | 0.02% |
| O88989     | Malate dehydrogenase, cytoplasmic                              | 0.08% | 0.08% | 0.08% | 0.05% | 0.06% | 0.06% |
| P02680     | Fibrinogen gamma chain                                         | 0.30% | 0.38% | 0.27% | 0.31% | 0.29% | 0.26% |
| P16617     | Phosphoglycerate kinase 1                                      | 0.38% | 0.41% | 0.27% | 0.30% | 0.35% | 0.43% |
| P42123     | L-lactate dehydrogenase B chain                                | 0.44% | 0.23% | 0.43% | 0.15% | 0.51% | 0.13% |
| P50503     | Hsc70-interacting protein                                      | 0.14% | 0.11% | 0.10% | 0.11% | 0.07% | 0.11% |
| P51583     | Multifunctional protein ADE2                                   | 0.04% | 0.06% |       |       |       | 0.03% |
| P51635     | Aldo-keto reductase family 1 member A1                         | 0.08% | 0.05% |       | 0.05% |       |       |
| P63029     | Translationally-controlled tumor protein                       | 0.20% | 0.28% | 0.15% | 0.09% | 0.16% | 0.12% |
| P68255     | 14-3-3 protein theta                                           | 0.48% | 0.59% | 0.60% | 0.45% | 0.56% | 0.52% |
| P68511     | 14-3-3 protein eta                                             | 0.61% | 0.62% | 0.67% | 0.63% | 0.66% | 0.62% |
| P85968     | 6-phosphogluconate dehydrogenase, decarboxylating              | 0.07% | 0.14% | 0.13% | 0.13% | 0.08% | 0.13% |
| P85973     | Purine nucleoside phosphorylase                                | 0.15% | 0.06% |       |       |       | 0.07% |
| Q5M860     | Rho GDP dissociation                                           | 0.46% | 0.36% | 0.30% | 0.19% | 0.23% | 0.23% |

|        |                                              |       |       |       |       |       |       |
|--------|----------------------------------------------|-------|-------|-------|-------|-------|-------|
|        | inhibitor beta                               |       |       |       |       |       |       |
| Q5U2U2 | Crk-like protein                             |       | 0.08% |       | 0.05% |       | 0.07% |
| Q62658 | Peptidyl-prolyl cis-trans isomerase FKBP1A   | 0.40% | 0.31% |       | 0.37% | 0.17% | 0.38% |
| Q6LDG5 | Hypoxanthine phosphoribosyltransferase       | 0.16% |       | 0.11% | 0.10% |       | 0.13% |
| Q6P3V8 | Eukaryotic translation initiation factor 4A1 | 0.12% | 0.08% | 0.04% | 0.08% | 0.07% | 0.10% |
| Q6P686 | Osteoclast-stimulating factor 1              | 0.08% | 0.12% | 0.08% | 0.08% |       | 0.06% |
| Q6P9U7 | L-lactate dehydrogenase                      | 0.48% | 0.31% | 0.40% | 0.27% | 0.41% | 0.31% |
| Q920H8 | Hephaestin                                   | 0.02% | 0.02% | 0.02% | 0.02% | 0.02% | 0.01% |
| Q9EQS0 | Transaldolase                                | 0.20% | 0.20% | 0.18% | 0.12% | 0.11% | 0.12% |

**Table S21.** List of the proteins related to nucleus.

| Protein IDs | Protein names                                        | HA-1d | MHA-1d | HA-4d | MHA-4d | HA-7d | MHA-7d |
|-------------|------------------------------------------------------|-------|--------|-------|--------|-------|--------|
| A0A0G2JYL0  | Endothelial PAS domain-containing protein 1          | 0.02% |        | 0.02% |        | 0.02% | 0.02%  |
| A0A0G2K0N8  | Uncharacterized protein                              | 0.20% |        | 0.20% | 0.12%  | 0.21% | 0.16%  |
| A0A0G2K1C0  | Actin-related protein 3                              | 0.28% | 0.25%  | 0.31% | 0.30%  | 0.30% | 0.29%  |
| A0A0G2K654  | Histone cluster 1 H1 family member c                 | 0.53% | 0.39%  |       | 0.29%  |       | 0.21%  |
| A0A0G2K689  | Uncharacterized protein                              | 0.20% |        |       |        |       |        |
| B2GVB1      | Protein S100                                         | 0.57% | 0.55%  | 0.59% | 0.53%  | 0.62% | 0.46%  |
| B2RZ27      | SH3 domain binding glutamic acid-rich protein-like 3 | 0.54% | 0.52%  | 0.85% | 0.76%  | 0.89% | 0.66%  |
| B5DF65      | Biliverdin reductase B                               | 0.13% | 0.12%  |       | 0.12%  |       | 0.10%  |
| D3ZB30      | Polypyrimidine tract binding protein 1               |       | 0.05%  |       |        |       | 0.04%  |
| D3ZBN0      | Histone H1.5                                         | 0.29% | 0.32%  |       | 0.16%  |       | 0.17%  |
| D4A057      | RCG58394                                             | 0.20% | 0.13%  | 0.21% | 0.19%  | 0.22% | 0.11%  |
| D4A8D5      | Filamin B                                            | 0.01% | 0.02%  | 0.01% | 0.02%  |       | 0.01%  |
| D4AC36      | Eukaryotic translation initiation factor 3 subunit F | 0.05% | 0.05%  |       | 0.07%  |       | 0.04%  |
| D4ACV3      | Histone H2A                                          | 0.21% | 0.20%  |       |        | 0.15% | 0.17%  |
| D4ACW1      | NOP2 nucleolar protein                               | 0.03% | 0.03%  |       | 0.02%  |       |        |
| F1LQB2      | Structural maintenance of chromosomes protein        | 0.02% | 0.02%  | 0.02% | 0.02%  | 0.02% | 0.02%  |
| F1M2K3      | Small ubiquitin-related modifier                     | 0.35% | 0.25%  | 0.28% | 0.25%  | 0.29% | 0.21%  |
| F1M7J7      | Centrosomal protein 250                              |       | 0.01%  |       |        |       |        |
| G3V721      | WW domain binding                                    | 0.07% |        | 0.07% |        |       | 0.05%  |

|        |                                                  |       |       |       |       |       |       |
|--------|--------------------------------------------------|-------|-------|-------|-------|-------|-------|
|        | protein 2                                        |       |       |       |       |       |       |
| G3V8U9 | Proteasome subunit beta                          | 0.22% | 0.11% | 0.34% | 0.14% | 0.24% | 0.12% |
| M0RBQ5 | Histone H2B                                      | 0.41% | 0.20% | 0.43% | 0.19% | 0.37% | 0.22% |
| O35355 | Guanine nucleotide-binding protein subunit gamma | 0.72% | 0.46% | 0.50% | 0.67% |       | 0.58% |
| O35814 | Stress-induced-phosphoprotein 1                  | 0.05% | 0.04% | 0.05% | 0.04% | 0.05% | 0.04% |
| O88656 | Actin-related protein 2/3 complex subunit 1B     | 0.25% | 0.20% | 0.19% | 0.17% | 0.18% | 0.17% |
| P04961 | Proliferating cell nuclear antigen               | 0.13% |       | 0.10% |       |       |       |
| P05197 | Elongation factor 2                              | 0.10% | 0.10% | 0.10% | 0.14% | 0.05% | 0.09% |
| P05370 | Glucose-6-phosphate 1-dehydrogenase              | 0.06% | 0.12% |       | 0.07% |       | 0.09% |
| P05942 | Protein S100-A4                                  | 0.40% | 1.09% | 0.25% | 0.90% | 0.17% | 0.71% |
| P05982 | NAD(P)H dehydrogenase                            | 0.15% | 0.09% | 0.13% | 0.09% | 0.10% | 0.05% |
| P07335 | Creatine kinase B-type                           | 0.40% | 0.34% | 0.42% | 0.44% | 0.39% | 0.45% |
| P0DMW1 | Heat shock 70 kDa protein 1B                     | 0.27% | 0.25% | 0.25% | 0.21% | 0.19% | 0.17% |
| P11980 | Pyruvate kinase PKM                              | 0.89% | 0.77% | 0.73% | 0.75% | 0.75% | 0.66% |
| P18420 | Proteasome subunit alpha type-1                  | 0.16% | 0.19% | 0.10% | 0.12% | 0.14% | 0.15% |
| P25113 | Phosphoglycerate mutase 1                        | 0.23% | 0.19% | 0.24% | 0.21% | 0.21% | 0.24% |
| P35213 | 14-3-3 protein beta/alpha                        | 0.51% | 0.59% | 0.53% | 0.47% | 0.48% | 0.54% |
| P36972 | Adenine phosphoribosyltransferase                |       | 0.14% | 0.10% | 0.14% |       |       |
| P40307 | Proteasome subunit beta type-2                   | 0.25% | 0.08% | 0.26% |       | 0.22% |       |
| P47875 | Cysteine and glycine-rich protein 1              |       | 0.13% |       | 0.09% |       | 0.11% |
| P48500 | Triosephosphate isomerase                        | 0.46% | 0.58% | 0.52% | 0.56% | 0.58% | 0.48% |
| P60901 | Proteasome subunit alpha type-6                  | 0.45% | 0.30% | 0.50% | 0.26% | 0.53% | 0.33% |
| P62260 | 14-3-3 protein epsilon                           | 0.78% | 0.72% | 0.78% | 0.61% | 0.74% | 0.58% |
| P62775 | Myotrophin                                       | 0.44% | 0.35% | 0.23% | 0.21% |       | 0.18% |
| P62804 | Histone H4                                       | 0.25% | 0.16% |       |       | 0.18% | 0.20% |
| Q4KM35 | Proteasome subunit beta type-10                  | 0.10% | 0.06% | 0.07% |       | 0.07% |       |
| Q63798 | Proteasome activator complex subunit 2           | 0.11% | 0.17% | 0.07% | 0.13% |       |       |
| Q66H11 | GTP-binding nuclear                              | 0.43% | 0.34% | 0.28% | 0.33% | 0.21% | 0.31% |

|            |                                                        |       |       |       |       |       |       |
|------------|--------------------------------------------------------|-------|-------|-------|-------|-------|-------|
|            | protein Ran                                            |       |       |       |       |       |       |
| Q66X93     | Staphylococcal nuclease domain-containing protein 1    | 0.10% | 0.06% | 0.07% | 0.05% | 0.03% | 0.02% |
| Q68FR6     | Elongation factor 1-gamma                              | 0.11% | 0.09% | 0.08% | 0.07% |       | 0.06% |
| Q68FX4     | Hematopoietic cell-specific LYN substrate 1            | 0.07% | 0.05% | 0.06% | 0.07% | 0.04% | 0.07% |
| Q6AYD3     | Proliferation-associated protein 2G4                   | 0.17% | 0.13% | 0.18% | 0.10% | 0.07% | 0.10% |
| Q6P9V6     | Proteasome subunit alpha type                          | 0.99% | 0.52% | 1.18% | 0.57% | 1.27% | 0.67% |
| Q6Q0N1     | Cytosolic non-specific dipeptidase                     | 0.11% | 0.16% | 0.11% | 0.08% | 0.10% | 0.10% |
| Q9JJ54     | Heterogeneous nuclear ribonucleoprotein D0             | 0.07% | 0.05% |       | 0.07% |       | 0.04% |
| Q9R0I8     | Phosphatidylinositol 5-phosphate 4-kinase type-2 alpha |       | 0.06% | 0.04% |       |       | 0.03% |
| A0A0A0MY14 | Ribosomal protein S28-like                             | 0.24% | 0.23% | 0.38% | 0.34% |       | 0.19% |
| A0A1W2Q631 | 40S ribosomal protein S16                              | 0.17% |       | 0.12% |       | 0.12% | 0.09% |
| D3ZJE2     | Uncharacterized protein                                | 0.16% | 0.15% | 0.17% | 0.15% | 0.17% | 0.13% |
| D4A4D5     | Similar to 60S acidic ribosomal protein P2             | 0.24% | 0.54% | 0.25% | 0.53% | 0.35% | 0.59% |
| E9PSU5     | Uncharacterized protein                                | 0.13% |       |       | 0.05% |       | 0.06% |
| F1LT35     | Similar to 60S ribosomal protein L23a                  | 0.16% |       |       |       |       |       |
| P19945     | 60S acidic ribosomal protein P0                        | 0.08% | 0.16% | 0.06% | 0.08% | 0.09% | 0.11% |
| P84100     | 60S ribosomal protein L19                              | 0.12% |       |       |       |       |       |
| Q9QX80     | CArG-binding factor A                                  | 0.09% |       | 0.06% |       | 0.07% | 0.07% |

**Table S22.** List of the up-regulation, down-regulation and non-regulation proteins related to endosome membrane [GO:0010008].

| Protein IDs | Protein names                               | 1d   | 4d   | 7d   |
|-------------|---------------------------------------------|------|------|------|
| F8V328      | RAB8                                        | down | down | down |
| Q5U300      | Ubiquitin-like modifier-activating enzyme 1 | non  | down | up   |
| G3V624      | Coronin                                     | up   | up   | up   |

**Table S23.** List of the up-regulation, down-regulation and non-regulation proteins related to recycling endosome [GO:0055037].

| Protein IDs | Protein names | 1d   | 4d   | 7d   |
|-------------|---------------|------|------|------|
| Q5RKJ9      | RAB10         | down | up   | down |
| B0BMW0      | RAB14         | non  | down | down |

**Table S24.** List of the up-regulation, down-regulation and non-regulation proteins related to early endosome [GO:0005769].

| Protein IDs | Protein names              | 1d   | 4d   | 7d   |
|-------------|----------------------------|------|------|------|
| A1L1J8      | RAB5B                      | non  | down | down |
| Q91ZN1      | Coronin-1A                 | up   | non  | up   |
| Q9JHL4      | Drebrin-like protein       |      | down |      |
| Q6NYB7      | Ras-related protein Rab-1A | down | down | down |

**Table S25.** List of the up-regulation, down-regulation and non-regulation proteins related to endosome [GO:0005768].

| Protein IDs | Protein names                                  | 1d   | 4d   | 7d   |
|-------------|------------------------------------------------|------|------|------|
| G3V7L8      | ATPase, H <sup>+</sup> transporting            | down | up   | up   |
| Q63769      | Sushi repeat-containing protein SRPX           | non  | down | down |
| B2GVB9      | Fermitin family member 3                       | up   | up   | non  |
| Q6P9V7      | Proteasome                                     | down | down | down |
| R4I4V9      | Neutrophil cytosolic factor 2 mutant isoform 2 | non  | down | up   |

**Table S26.** List of the up-regulation, down-regulation and non-regulation proteins related to lysosome [GO:0005764].

| Protein IDs | Protein names                              | 1d   | 4d   | 7d   |
|-------------|--------------------------------------------|------|------|------|
| A0A0G2K6Z6  | Tartrate-resistant acid phosphatase type 5 |      | up   | down |
| B2RYP4      | Sorting nexin 2                            | down | down | up   |
| D3ZZR3      | Cathepsin S                                | down | down | down |
| F1LQQ8      | Beta-glucuronidase                         |      | down | down |
| F1M779      | Clathrin heavy chain                       | down | up   | up   |
| M0RCB1      | Uncharacterized protein                    | up   | down | non  |
| O35186      | Cathepsin K                                |      | down | up   |
| O35244      | Peroxiredoxin-6                            | up   | down | down |
| P04762      | Catalase                                   | down | down |      |
| P14841      | Cystatin-C                                 | down | down | down |
| P45479      | Palmitoyl-protein thioesterase 1           |      | down | down |
| Q5U2V4      | Phospholipase B-like 1                     | down | up   | down |
| Q641X3      | Beta-hexosaminidase subunit alpha          |      | down | down |
| Q6IN22      | Cathepsin B                                | up   | down | down |
| Q6P6T6      | Cathepsin D                                | up   | down | down |
| Q6P7A4      | Prosaposin                                 | up   | down | down |
| Q9EPB1      | Dipeptidyl peptidase 2                     | down | down | down |
| Q9QZK8      | Deoxyribonuclease-2-alpha                  | down | down | down |
| Q9R1T3      | Cathepsin Z                                | up   | down | non  |

**Table S27.** List of the up-regulation, down-regulation and non-regulation proteins related to lysosomal membrane [GO:0005765].

| Protein IDs | Protein names                     | 1d   | 4d   | 7d   |
|-------------|-----------------------------------|------|------|------|
| B2GUV5      | V-type proton ATPase subunit G    | down | down | down |
| B2RYC9      | Glucosylceramidase                | up   | up   | down |
| D3ZPN1      | NPR2-like, GATOR1 complex subunit | up   |      |      |
| P34058      | Heat shock protein HSP 90-beta    | down | up   | up   |
| Q6AYS3      | Carboxypeptidase                  | up   | down | down |

**Table S28.** List of the up-regulation, down-regulation and non-regulation proteins related to endoplasmic reticulum membrane [GO:0005789].

| Protein IDs | Protein names    | 1d | 4d   | 7d   |
|-------------|------------------|----|------|------|
| A0A0A0MY09  | Endoplasmin      | up | down | down |
| P06762      | Heme oxygenase 1 | up |      |      |
| P50137      | Transketolase    | up | up   | up   |

**Table S29.** List of the up-regulation, down-regulation and non-regulation proteins related to endoplasmic reticulum lumen [GO:0005788].

| Protein IDs | Protein names                             | 1d   | 4d   | 7d   |
|-------------|-------------------------------------------|------|------|------|
| A0A0G2KAY8  | Selenoprotein F                           |      | up   | down |
| P04785      | Protein disulfide-isomerase               | down | down | up   |
| P52555      | Endoplasmic reticulum resident protein 29 |      | up   | up   |

**Table S30.** List of the up-regulation, down-regulation and non-regulation proteins related to endoplasmic reticulum exit site [GO:0070971].

| Protein IDs | Protein names                               | 1d | 4d | 7d |
|-------------|---------------------------------------------|----|----|----|
| A0A140TAA4  | Programmed cell death 6-interacting protein |    | up | up |

**Table S31.** List of the up-regulation, down-regulation and non-regulation proteins related to endoplasmic reticulum [GO:0005783].

| Protein IDs | Protein names                             | 1d   | 4d   | 7d   |
|-------------|-------------------------------------------|------|------|------|
| A0A0G2JSZ5  | Protein disulfide-isomerase A6            | up   | up   | non  |
| F1LQS6      | RCG61833                                  | down | down | down |
| P11030      | Acyl-CoA-binding protein                  | up   | up   | up   |
| P14480      | Fibrinogen beta chain                     | down | up   | up   |
| P46462      | Transitional endoplasmic reticulum ATPase | down | down | up   |

**Table S32.** List of the up-regulation, down-regulation and non-regulation proteins related to rough endoplasmic reticulum [GO:0005791].

| Protein IDs | Protein names                              | 1d | 4d | 7d |
|-------------|--------------------------------------------|----|----|----|
| P14844      | C-C motif chemokine 2                      | up | up | up |
| P31044      | Phosphatidylethanolamine-binding protein 1 | up | up | up |
| P37377      | Alpha-synuclein                            | up | up | up |
| Q63083      | Nucleobindin-1                             | up | up | up |

**Table S33.** List of the up-regulation, down-regulation and non-regulation proteins related to smooth endoplasmic reticulum [GO:0005790].

| Protein IDs | Protein names                         | 1d   | 4d   | 7d   |
|-------------|---------------------------------------|------|------|------|
| P24368      | Peptidyl-prolyl cis-trans isomerase B | down | down | down |
| Q9Z0V5      | Peroxiredoxin-4                       | non  | down | up   |
| P18418      | Calreticulin                          | down | up   | up   |

**Table S34.** List of the proteins related to immunoglobulin-binding protein.

| Protein IDs | Protein names                       | HA-1d | MHA-1d | HA-4d | MHA-4d | HA-7d | MHA-7d |
|-------------|-------------------------------------|-------|--------|-------|--------|-------|--------|
| M0RDZ5      | Uncharacterized protein             | 0.55% | 0.52%  | 0.48% | 0.51%  | 0.40% | 0.44%  |
| P20059      | Hemopexin                           | 0.13% | 0.11%  | 0.13% | 0.10%  | 0.14% | 0.10%  |
| A0A0G2K4I8  | Uncharacterized protein             | 0.22% | 0.22%  | 0.23% | 0.21%  | 0.24% | 0.18%  |
| A0A0G2K7S9  | Uncharacterized protein             | 0.22% |        |       |        | 0.16% |        |
| A0A0G2K828  | Uncharacterized protein             | 0.22% | 0.21%  | 0.22% | 0.20%  | 0.23% | 0.12%  |
| D3ZE00      | Uncharacterized protein             | 0.26% | 0.25%  | 0.27% | 0.24%  | 0.29% | 0.21%  |
| F1LWD0      | Uncharacterized protein             | 0.48% | 0.46%  | 0.50% | 0.45%  | 0.52% | 0.38%  |
| F1LXY6      | Uncharacterized protein             | 0.25% | 0.24%  | 0.26% | 0.24%  | 0.28% | 0.13%  |
| F1M0U4      | Uncharacterized protein             | 0.21% | 0.20%  | 0.22% | 0.20%  | 0.23% | 0.17%  |
| P06761      | Endoplasmic reticulum chaperone BiP | 0.45% | 0.40%  | 0.38% | 0.33%  | 0.41% | 0.24%  |
| A0A0G2K0M4  | Uncharacterized protein             | 0.28% | 0.27%  | 0.29% | 0.26%  | 0.30% | 0.23%  |
| A0A0G2K0N6  | Uncharacterized protein             | 0.18% | 0.17%  | 0.18% | 0.17%  | 0.29% | 0.21%  |
| M0R692      | Uncharacterized protein             | 0.26% | 0.25%  | 0.27% | 0.24%  | 0.28% | 0.21%  |

**Table 35.** List of the proteins related to protein disulfide isomerase.

| Protein IDs | Protein names                                        | HA-1d | MHA-1d | HA-4d | MHA-4d | HA-7d | MHA-7d |
|-------------|------------------------------------------------------|-------|--------|-------|--------|-------|--------|
| A0A0H2UHM5  | Protein disulfide-isomerase                          | 0.08% | 0.11%  | 0.06% | 0.09%  | 0.08% | 0.08%  |
| P04785      | Protein disulfide-isomerase (PDI)                    | 0.18% | 0.19%  | 0.16% | 0.12%  | 0.13% | 0.24%  |
| P11232      | Thioredoxin (Trx)                                    | 0.22% | 0.21%  | 0.21% | 0.19%  | 0.15% | 0.21%  |
| B2RZ27      | SH3 domain binding glutamic acid-rich protein-like 3 | 0.49% | 0.47%  | 0.59% | 0.61%  | 0.53% | 0.39%  |

**Table S36.** List of the proteins related to unfolded protein response

| Protein IDs | Protein names                | HA-1d | MHA-1d | HA-4d | MHA-4d | HA-7d | MHA-7d |
|-------------|------------------------------|-------|--------|-------|--------|-------|--------|
| A0A0A0MY09  | Endoplasmic                  | 0.11% | 0.13%  | 0.17% | 0.13%  | 0.19% | 0.13%  |
| M0RCB1      | Uncharacterized protein      | 0.62% | 0.66%  | 0.53% | 0.50%  | 0.53% | 0.53%  |
| P0DMW1      | Heat shock 70 kDa protein 1B | 0.27% | 0.25%  | 0.25% | 0.21%  | 0.19% | 0.17%  |
| P18418      | Calreticulin                 | 0.14% | 0.11%  | 0.12% | 0.15%  | 0.15% | 0.35%  |
| P34058      | Heat shock protein HSP       | 0.36% | 0.31%  | 0.34% | 0.36%  | 0.32% | 0.35%  |

|        |                                   |       |       |       |       |       |       |
|--------|-----------------------------------|-------|-------|-------|-------|-------|-------|
|        | 90-beta                           |       |       |       |       |       |       |
| P50503 | Hsc70-interacting protein         | 0.14% | 0.11% | 0.10% | 0.11% | 0.07% | 0.11% |
| P82995 | Heat shock protein HSP 90-alpha   | 0.27% | 0.20% | 0.28% | 0.26% | 0.26% | 0.27% |
| Q7TPB1 | T-complex protein 1 subunit delta | 0.11% | 0.05% | 0.05% | 0.08% | 0.04% | 0.08% |

**Table S37.** List of the proteins related to sterol regulatory element binding protein.

| Protein IDs | Protein names                             | HA-1d | MHA-1d | HA-4d | MHA-4d | HA-7d | MHA-7d |
|-------------|-------------------------------------------|-------|--------|-------|--------|-------|--------|
| B2RYC9      | Glucosylceramidase                        |       | 0.05%  | 0.10% | 0.12%  | 0.14% | 0.11%  |
| E9PSP1      | Phospholipid transfer protein             | 0.12% | 0.35%  | 0.31% | 0.37%  | 0.44% | 0.35%  |
| P04762      | Catalase                                  | 0.03% |        | 0.03% |        |       |        |
| P05370      | Glucose-6-phosphate 1-dehydrogenase       | 0.06% | 0.12%  |       | 0.07%  |       | 0.09%  |
| P14630      | Apolipoprotein M                          | 0.13% | 0.13%  | 0.14% | 0.08%  | 0.14% | 0.11%  |
| P46462      | Transitional endoplasmic reticulum ATPase | 0.28% | 0.13%  | 0.13% | 0.12%  | 0.09% | 0.13%  |
| Q06000      | Lipoprotein lipase                        | 0.11% | 0.21%  | 0.17% | 0.17%  | 0.17% | 0.17%  |
| Q07936      | Annexin A2                                | 0.29% | 0.38%  | 0.31% | 0.37%  | 0.37% | 0.55%  |
| Q6P9V1      | Tetraspanin                               |       |        |       | 0.07%  |       | 0.06%  |
| Q8CHN5      | Epididymal secretory protein 1            | 0.17% | 0.33%  | 0.18% | 0.32%  | 0.19% | 0.28%  |

**Table S38.** List of the proteins related to glucose-regulated proteins.

| Protein IDs | Protein names                       | HA-1d | MHA-1d | HA-4d | MHA-4d | HA-7d | MHA-7d |
|-------------|-------------------------------------|-------|--------|-------|--------|-------|--------|
| B2RYC9      | Glucosylceramidase                  |       | 0.05%  | 0.10% | 0.12%  | 0.14% | 0.11%  |
| O88767      | Protein/nucleic acid deglycase DJ-1 | 0.33% | 0.46%  | 0.25% | 0.13%  | 0.21% | 0.42%  |
| P05370      | Glucose-6-phosphate 1-dehydrogenase | 0.06% | 0.12%  |       | 0.07%  |       | 0.09%  |
| P06761      | Endoplasmic reticulum chaperone BiP | 0.45% | 0.40%  | 0.38% | 0.33%  | 0.41% | 0.24%  |
| P11232      | Thioredoxin                         | 0.49% | 0.47%  | 0.59% | 0.61%  | 0.53% | 0.39%  |
| P11762      | Galectin-1                          | 0.45% | 0.74%  | 0.40% | 0.77%  | 0.21% | 0.77%  |
| P11980      | Pyruvate kinase PKM                 | 0.89% | 0.77%  | 0.73% | 0.75%  | 0.75% | 0.66%  |
| P14630      | Apolipoprotein M                    | 0.13% | 0.13%  | 0.14% | 0.08%  | 0.14% | 0.11%  |
| P14844      | C-C motif chemokine 2               | 0.17% | 0.33%  | 0.24% | 0.32%  | 0.25% | 0.28%  |
| P19804      | Nucleoside diphosphate kinase B     | 0.49% | 0.42%  | 0.40% | 0.31%  | 0.48% | 0.53%  |
| P20961      | Plasminogen activator inhibitor 1   | 0.25% | 0.47%  | 0.26% | 0.51%  | 0.23% | 0.44%  |
| P61589      | Transforming protein RhoA           | 0.31% | 0.25%  | 0.23% | 0.20%  | 0.19% | 0.18%  |

|        |                                                        |       |       |       |       |       |       |
|--------|--------------------------------------------------------|-------|-------|-------|-------|-------|-------|
| Q80ZA3 | Alpha-2 antiplasmin                                    | 0.16% | 0.22% | 0.53% | 0.50% | 0.51% | 0.46% |
| Q8CFN2 | Cell division control protein 42 homolog               | 0.31% | 0.30% | 0.33% | 0.29% | 0.24% | 0.29% |
| Q9R0I8 | Phosphatidylinositol 5-phosphate 4-kinase type-2 alpha |       | 0.06% | 0.04% |       |       | 0.03% |

**Table S39-48.** List of the kegg pathway of detected proteins.

**Table S39.** List of the proteins in metabolic pathways.

| Protein IDs | Protein names                                               | HA-1d | MHA-1d | HA-4d | MHA-4d | HA-7d | MHA-7d |
|-------------|-------------------------------------------------------------|-------|--------|-------|--------|-------|--------|
| A0A0G2K3Z2  | Coiled-coil domain-containing 154                           |       | 0.02%  | 0.03% | 0.06%  | 0.03% | 0.04%  |
| A0A0G2K4H6  | N-acetylgalactosamine-6-sulfatase                           |       |        |       |        | 0.11% |        |
| B2GUV5      | V-type proton ATPase subunit G                              | 0.42% | 0.27%  | 0.43% | 0.39%  | 0.45% | 0.33%  |
| B2GUW7      | Rnase4 protein                                              | 0.15% |        |       | 0.21%  |       | 0.12%  |
| B2RYC9      | Glucosylceramidase                                          |       | 0.05%  | 0.10% | 0.12%  | 0.14% | 0.11%  |
| D3ZZS8      | ATPase H <sup>+</sup> -transporting V1 subunit B1           | 0.07% |        | 0.03% |        | 0.03% | 0.03%  |
| D4A133      | ATPase H <sup>+</sup> -transporting V1 subunit A            | 0.08% | 0.08%  | 0.09% | 0.05%  | 0.08% | 0.06%  |
| F1LP05      | ATP synthase subunit alpha                                  |       | 0.08%  |       | 0.06%  | 0.22% | 0.20%  |
| F1LQQ8      | Beta-glucuronidase                                          |       |        | 0.04% |        | 0.04% |        |
| F1LQS6      | RCG61833                                                    | 0.02% |        | 0.02% |        | 0.02% | 0.01%  |
| F1LR87      | Beta-hexosaminidase                                         | 0.05% |        | 0.05% | 0.03%  | 0.05% | 0.04%  |
| G3V6D3      | ATP synthase subunit beta                                   | 0.05% | 0.10%  | 0.12% | 0.05%  | 0.16% | 0.09%  |
| G3V7L8      | ATPase, H <sup>+</sup> transporting, V1 subunit E isoform 1 | 0.07% |        |       | 0.07%  |       | 0.09%  |
| O35244      | Peroxiredoxin-6                                             | 0.31% | 0.33%  | 0.32% | 0.21%  | 0.37% | 0.28%  |
| O88989      | Malate dehydrogenase, cytoplasmic                           | 0.08% | 0.08%  | 0.08% | 0.05%  | 0.06% | 0.06%  |
| P00507      | Aspartate aminotransferase, mitochondrial                   |       |        | 0.04% |        | 0.07% | 0.05%  |
| P04797      | Glyceraldehyde-3-phosphate dehydrogenase                    | 0.77% | 0.71%  | 0.66% | 0.64%  | 0.72% | 0.58%  |
| P05065      | Fructose-bisphosphate aldolase A                            | 0.68% | 0.86%  | 0.68% | 0.70%  | 0.55% | 0.74%  |
| P05370      | Glucose-6-phosphate 1-dehydrogenase                         | 0.06% | 0.12%  |       | 0.07%  |       | 0.09%  |
| P07335      | Creatine kinase B-type                                      | 0.40% | 0.34%  | 0.42% | 0.44%  | 0.39% | 0.45%  |

|        |                                                   |       |       |       |       |       |       |
|--------|---------------------------------------------------|-------|-------|-------|-------|-------|-------|
| P07943 | Aldose reductase                                  | 0.16% | 0.08% | 0.11% | 0.07% | 0.09% | 0.06% |
| P16617 | Phosphoglycerate kinase 1                         | 0.38% | 0.41% | 0.27% | 0.30% | 0.35% | 0.43% |
| P19804 | Nucleoside diphosphate kinase B                   | 0.49% | 0.42% | 0.40% | 0.31% | 0.48% | 0.53% |
| P25113 | Phosphoglycerate mutase 1                         | 0.23% | 0.19% | 0.24% | 0.21% | 0.21% | 0.24% |
| P36972 | Adenine phosphoribosyltransferase                 |       | 0.14% | 0.10% | 0.14% |       |       |
| P42123 | L-lactate dehydrogenase B chain                   | 0.44% | 0.23% | 0.43% | 0.15% | 0.51% | 0.13% |
| P45479 | Palmitoyl-protein thioesterase 1                  |       |       | 0.06% |       | 0.09% | 0.04% |
| P48500 | Triosephosphate isomerase                         | 0.46% | 0.58% | 0.52% | 0.56% | 0.58% | 0.48% |
| P50137 | Transketolase                                     | 0.46% | 0.54% | 0.38% | 0.54% | 0.32% | 0.45% |
| P51583 | Multifunctional protein ADE2                      | 0.04% | 0.06% |       |       |       | 0.03% |
| P51635 | Aldo-keto reductase family 1 member A1            | 0.08% | 0.05% |       | 0.05% |       |       |
| P85968 | 6-phosphogluconate dehydrogenase, decarboxylating | 0.07% | 0.14% | 0.13% | 0.13% | 0.08% | 0.13% |
| P85973 | Purine nucleoside phosphorylase                   | 0.15% | 0.06% |       |       |       | 0.07% |
| Q0QF43 | Malate dehydrogenase                              | 0.06% | 0.04% | 0.13% | 0.17% | 0.13% | 0.12% |
| Q5BJ93 | Enolase 1                                         | 0.42% | 0.46% | 0.46% | 0.41% | 0.44% | 0.37% |
| Q5M7T7 | Platelet-activating factor acetylhydrolase        | 0.27% | 0.26% | 0.42% | 0.43% | 0.52% | 0.37% |
| Q5M7X1 | Coatomer subunit beta'                            | 0.04% |       | 0.03% | 0.02% | 0.02% | 0.02% |
| Q641X3 | Beta-hexosaminidase subunit alpha                 |       |       | 0.05% |       | 0.05% |       |
| Q641Z7 | Acid sphingomyelinase-like phosphodiesterase 3a   | 0.06% |       | 0.16% |       | 0.19% | 0.08% |
| Q6AY07 | Fructose-bisphosphate aldolase                    | 0.53% | 0.62% | 0.45% | 0.52% | 0.39% | 0.52% |
| Q6AYE5 | Out at first protein homolog                      | 0.06% | 0.09% |       | 0.14% |       | 0.14% |
| Q6LDG5 | Hypoxanthine phosphoribosyltransferase            | 0.16% |       | 0.11% | 0.10% |       | 0.13% |
| Q6P7S0 | Pyruvate kinase                                   | 0.88% | 0.81% | 0.77% | 0.79% | 0.78% | 0.72% |
| Q6P9U7 | L-lactate dehydrogenase                           | 0.48% | 0.31% | 0.40% | 0.27% | 0.41% | 0.31% |
| Q6Q0N1 | Cytosolic non-specific dipeptidase                | 0.11% | 0.16% | 0.11% | 0.08% | 0.10% | 0.10% |

|        |                               |       |       |       |       |       |       |
|--------|-------------------------------|-------|-------|-------|-------|-------|-------|
| Q7TQ90 | Ac1002                        | 0.02% | 0.03% | 0.03% | 0.03% | 0.02% | 0.02% |
| Q91W30 | Aldose reductase-like protein | 0.24% | 0.23% | 0.25% | 0.22% | 0.26% | 0.19% |
| Q9EQS0 | Transaldolase                 | 0.20% | 0.20% | 0.18% | 0.12% | 0.11% | 0.12% |

**Table S40.** List of the proteins in apoptotic pathways.

| Protein IDs | Protein names                       | HA-1d | MHA-1d | HA-4d | MHA-4d | HA-7d | MHA-7d |
|-------------|-------------------------------------|-------|--------|-------|--------|-------|--------|
| A0A0G2K1C0  | Actin-related protein 3             | 0.28% | 0.25%  | 0.31% | 0.30%  | 0.30% | 0.29%  |
| A0A0H2UHM7  | Tubulin alpha chain                 | 0.34% | 0.37%  | 0.36% | 0.34%  | 0.31% | 0.31%  |
| M0RD20      | Calpain small subunit 1-like        | 0.11% | 0.25%  | 0.12% | 0.07%  | 0.12% | 0.18%  |
| P68370      | Tubulin alpha-1A chain              | 0.42% | 0.42%  | 0.45% | 0.41%  | 0.39% | 0.29%  |
| P70482      | Lamin C2                            | 0.11% | 0.10%  | 0.11% | 0.22%  | 0.18% | 0.19%  |
| Q5XIF6      | Tubulin alpha-4A chain              | 0.30% | 0.31%  | 0.26% | 0.28%  | 0.21% | 0.26%  |
| Q6IN22      | Cathepsin B                         | 0.38% | 0.46%  | 0.55% | 0.40%  | 0.60% | 0.49%  |
| Q6P9V9      | Tubulin alpha-1B chain              | 0.42% | 0.42%  | 0.45% | 0.39%  | 0.39% | 0.31%  |
| Q9R1T3      | Cathepsin Z                         | 0.08% | 0.11%  | 0.09% |        | 0.18% | 0.18%  |
| D3ZYK8      | Matrix metalloproteinase 9          |       | 0.02%  | 0.26% | 0.44%  | 0.25% | 0.41%  |
| P14844      | C-C motif chemokine 2               | 0.17% | 0.33%  | 0.24% | 0.32%  | 0.25% | 0.28%  |
| Q10746      | C-X-C motif chemokine 3             |       |        |       | 0.24%  |       | 0.14%  |
| O88767      | Protein/nucleic acid deglycase DJ-1 | 0.33% | 0.46%  | 0.25% | 0.13%  | 0.21% | 0.42%  |
| P02680      | Fibrinogen gamma chain              | 0.30% | 0.38%  | 0.27% | 0.31%  | 0.29% | 0.26%  |
| P14480      | Fibrinogen beta chain               | 0.40% | 0.39%  | 0.35% | 0.38%  | 0.30% | 0.31%  |

**Table S41.** List of the proteins in protein digestion and absorption pathways.

| Protein IDs | Protein names                                      | HA-1d | MHA-1d | HA-4d | MHA-4d | HA-7d | MHA-7d |
|-------------|----------------------------------------------------|-------|--------|-------|--------|-------|--------|
| A0A0G2JX47  | Collagen alpha-1(V) chain                          |       |        | 0.02% |        | 0.02% |        |
| A0A0G2K5E8  | Collagen, type I, alpha 2                          | 0.10% | 0.04%  | 0.33% | 0.35%  | 0.40% | 0.29%  |
| O70598      | Collagen alpha 2 type V                            |       |        | 0.12% |        | 0.13% | 0.09%  |
| P02454      | Collagen alpha-1(I) chain                          | 0.10% | 0.05%  | 0.38% | 0.29%  | 0.43% | 0.28%  |
| P13941      | Collagen alpha-1(III) chain                        |       |        | 0.17% | 0.06%  | 0.21% | 0.10%  |
| Q04679      | Sodium/potassium-transporting ATPase subunit gamma |       | 0.25%  | 0.41% | 0.37%  | 0.43% | 0.32%  |
| Q9EPB1      | Dipeptidyl peptidase 2                             | 0.05% |        | 0.04% |        | 0.06% | 0.03%  |

**Table S42.** List of the proteins in calcium signaling pathway.

| Protein IDs | Protein names             | HA-1d | MHA-1d | HA-4d | MHA-4d | HA-7d | MHA-7d |
|-------------|---------------------------|-------|--------|-------|--------|-------|--------|
| F1M779      | Clathrin heavy chain      | 0.03% | 0.02%  | 0.02% | 0.03%  | 0.02% | 0.03%  |
| P0DP31      | Calmodulin-3              | 0.45% | 0.54%  | 0.58% | 0.63%  | 0.49% | 0.50%  |
| P24368      | Peptidyl-prolyl cis-trans | 0.60% | 0.27%  | 0.62% | 0.41%  | 0.65% | 0.54%  |

|        |                                                    |       |       |       |       |       |       |
|--------|----------------------------------------------------|-------|-------|-------|-------|-------|-------|
|        | isomerase B                                        |       |       |       |       |       |       |
| Q04679 | Sodium/potassium-transporting ATPase subunit gamma |       | 0.25% | 0.41% | 0.37% | 0.43% | 0.32% |
| Q4FZY0 | EF-hand domain-containing protein D2               | 0.11% | 0.24% |       | 0.23% |       | 0.20% |
| Q5PPP1 | Clathrin light chain                               |       |       | 0.08% |       |       | 0.06% |
| Q6AYC4 | Macrophage-capping protein                         | 0.29% | 0.38% | 0.26% | 0.43% | 0.21% | 0.32% |

**Table S43.** List of the proteins in p53 signaling pathway.

| Protein IDs | Protein names                     | HA-1d | MHA-1d | HA-4d | MHA-4d | HA-7d | MHA-7d |
|-------------|-----------------------------------|-------|--------|-------|--------|-------|--------|
| P20961      | Plasminogen activator inhibitor 1 | 0.25% | 0.47%  | 0.26% | 0.51%  | 0.23% | 0.44%  |
| Q5EBB0      | Similar to 14-3-3 protein sigma   | 0.31% | 0.39%  | 0.39% | 0.29%  | 0.33% | 0.30%  |
| Q5RK13      | Igf1 protein                      |       | 0.19%  |       | 0.19%  |       | 0.16%  |

**Table S44.** List of the proteins in PI3K-Akt signaling pathway.

| Protein IDs | Protein names                                    | HA-1d | MHA-1d | HA-4d | MHA-4d | HA-7d | MHA-7d |
|-------------|--------------------------------------------------|-------|--------|-------|--------|-------|--------|
| A0A096P6L8  | Fibronectin                                      | 0.77% | 0.67%  | 1.16% | 0.96%  | 1.16% | 0.94%  |
| A0A0A0MY09  | Endoplasmic reticulum chaperone protein BiP      | 0.11% | 0.13%  | 0.17% | 0.13%  | 0.19% | 0.13%  |
| A0A0G2JWK0  | Integrin beta                                    | 0.03% |        |       |        | 0.05% | 0.06%  |
| A0A0G2K3Z2  | Coiled-coil domain-containing protein 154        |       | 0.02%  | 0.03% | 0.06%  | 0.03% | 0.04%  |
| A0A0G2K5E8  | Collagen, type I, alpha 2                        | 0.10% | 0.04%  | 0.33% | 0.35%  | 0.40% | 0.29%  |
| D4A057      | RCG58394                                         | 0.20% | 0.13%  | 0.21% | 0.19%  | 0.22% | 0.11%  |
| F1MAA7      | Laminin subunit gamma 1                          |       |        | 0.02% |        | 0.03% |        |
| O08591      | Perlecan                                         |       |        | 0.40% |        | 0.42% |        |
| O35355      | Guanine nucleotide-binding protein subunit gamma | 0.72% | 0.46%  | 0.50% | 0.67%  |       | 0.58%  |
| O35511      | A regulatory subunit of protein phosphatase 2A   |       | 0.10%  |       | 0.15%  |       | 0.13%  |
| O70598      | Collagen alpha 2 type V                          |       |        | 0.12% |        | 0.13% | 0.09%  |
| P02454      | Collagen alpha-1(I) chain                        | 0.10% | 0.05%  | 0.38% | 0.29%  | 0.43% | 0.28%  |
| P34058      | Heat shock protein HSP 90-beta                   | 0.36% | 0.31%  | 0.34% | 0.36%  | 0.32% | 0.35%  |
| P35213      | 14-3-3 protein beta/alpha                        | 0.51% | 0.59%  | 0.53% | 0.47%  | 0.48% | 0.54%  |
| P54311      | Guanine nucleotide-binding protein G             | 0.23% | 0.15%  | 0.21% | 0.14%  | 0.25% | 0.08%  |
| P61983      | 14-3-3 protein gamma                             | 0.60% | 0.61%  | 0.70% | 0.47%  | 0.66% | 0.51%  |
| P62260      | 14-3-3 protein epsilon                           | 0.78% | 0.72%  | 0.78% | 0.61%  | 0.74% | 0.58%  |
| P63102      | 14-3-3 protein zeta/delta                        | 1.20% | 1.18%  | 1.32% | 1.08%  | 1.30% | 1.07%  |

|        |                                 |       |       |       |       |       |       |
|--------|---------------------------------|-------|-------|-------|-------|-------|-------|
| P68255 | 14-3-3 protein theta            | 0.48% | 0.59% | 0.60% | 0.45% | 0.56% | 0.52% |
| P68511 | 14-3-3 protein eta              | 0.61% | 0.62% | 0.67% | 0.63% | 0.66% | 0.62% |
| P82995 | Heat shock protein HSP 90-alpha | 0.27% | 0.20% | 0.28% | 0.26% | 0.26% | 0.27% |
| P97827 | Osteopontin                     |       |       |       |       | 0.15% | 0.13% |
| Q5RK05 | Matrix Gla protein              |       |       |       |       | 0.26% | 0.13% |
| Q5RK13 | Igf1 protein                    |       | 0.19% |       | 0.19% |       | 0.16% |
| Q62905 | Vitronectin                     | 0.05% | 0.05% | 0.05% | 0.05% | 0.06% | 0.04% |
| Q71SA3 | Thrombospondin 1                | 0.36% | 0.39% | 0.52% | 0.39% | 0.57% | 0.38% |

**Table S45.** List of the proteins in mTOR signaling pathway.

| Protein IDs | Protein names | HA-1d | MHA-1d | HA-4d | MHA-4d | HA-7d | MHA-7d |
|-------------|---------------|-------|--------|-------|--------|-------|--------|
| Q5RK13      | Igf1 protein  |       | 0.19%  |       | 0.19%  |       | 0.16%  |

**Table S46.** List of the proteins in protein processing in endoplasmic reticulum pathway.

| Protein IDs | Protein names                             | HA-1d | MHA-1d | HA-4d | MHA-4d | HA-7d | MHA-7d |
|-------------|-------------------------------------------|-------|--------|-------|--------|-------|--------|
| A0A0A0MY09  | Endoplasmic reticulum chaperone BiP       | 0.11% | 0.13%  | 0.17% | 0.13%  | 0.19% | 0.13%  |
| A0A0G2JSZ5  | Protein disulfide-isomerase A6            | 0.08% | 0.11%  | 0.06% | 0.09%  | 0.08% | 0.08%  |
| A0A0H2UHM5  | Protein disulfide-isomerase               | 0.18% | 0.19%  | 0.16% | 0.12%  | 0.13% | 0.24%  |
| D4A3X0      | Centrosomal protein 192                   | 0.02% | 0.02%  | 0.02% | 0.02%  | 0.02% | 0.01%  |
| M0RCB1      | Uncharacterized protein                   | 0.62% | 0.66%  | 0.53% | 0.50%  | 0.53% | 0.53%  |
| M0RD20      | Calpain small subunit 1-like              | 0.11% | 0.25%  | 0.12% | 0.07%  | 0.12% | 0.18%  |
| P04785      | Protein disulfide-isomerase               | 0.22% | 0.21%  | 0.21% | 0.19%  | 0.15% | 0.21%  |
| P06761      | Endoplasmic reticulum chaperone BiP       | 0.45% | 0.40%  | 0.38% | 0.33%  | 0.41% | 0.24%  |
| P0DMW1      | Heat shock 70 kDa protein 1B              | 0.27% | 0.25%  | 0.25% | 0.21%  | 0.19% | 0.17%  |
| P18418      | Calreticulin                              | 0.14% | 0.11%  | 0.12% | 0.15%  | 0.15% | 0.35%  |
| P34058      | Heat shock protein HSP 90-beta            | 0.36% | 0.31%  | 0.34% | 0.36%  | 0.32% | 0.35%  |
| P46462      | Transitional endoplasmic reticulum ATPase | 0.28% | 0.13%  | 0.13% | 0.12%  | 0.09% | 0.13%  |
| P52555      | Endoplasmic reticulum resident protein 29 |       |        |       | 0.09%  |       | 0.16%  |
| P82995      | Heat shock protein HSP 90-alpha           | 0.27% | 0.20%  | 0.28% | 0.26%  | 0.26% | 0.27%  |
| Q6AY18      | SAR1 gene homolog A                       | 0.13% | 0.12%  |       | 0.08%  |       |        |
| P37377      | Alpha-synuclein                           |       | 0.50%  |       | 0.36%  |       | 0.37%  |
| P14480      | Fibrinogen beta chain                     | 0.40% | 0.39%  | 0.35% | 0.38%  | 0.30% | 0.31%  |
| P11030      | Acyl-CoA-binding                          |       | 0.46%  |       | 0.53%  |       | 0.46%  |

| protein    |                                             |       |       |       |
|------------|---------------------------------------------|-------|-------|-------|
| P06762     | Heme oxygenase 1                            | 0.08% |       |       |
| A0A140TAA4 | Programmed cell death 6-interacting protein |       | 0.02% | 0.02% |
| A0A0G2KAY8 | Selenoprotein F                             | 0.15% | 0.18% | 0.13% |

**Table S47.** List of the proteins in AMPK signaling pathway.

| Protein IDs | Protein names                     | HA-1d | MHA-1d | HA-4d | MHA-4d | HA-7d | MHA-7d |
|-------------|-----------------------------------|-------|--------|-------|--------|-------|--------|
| A0A0G2JZR4  | Ras-related protein Rab-11B       | 0.58% | 0.52%  | 0.49% | 0.43%  | 0.51% | 0.38%  |
| B0BMW0      | RAB14, member RAS oncogene family | 0.08% | 0.08%  | 0.12% |        | 0.13% | 0.06%  |
| F1LP82      | Ras-related protein Rab-2A        | 0.12% | 0.12%  | 0.13% | 0.12%  | 0.14% | 0.07%  |
| F8V328      | RAB8                              | 0.28% | 0.23%  | 0.29% | 0.22%  | 0.26% | 0.19%  |
| P05197      | Elongation factor 2               | 0.10% | 0.10%  | 0.10% | 0.14%  | 0.05% | 0.09%  |

**Table S48.** List of the proteins in ubiquitin mediated proteolysis pathway.

| Protein IDs | Protein names                                 | HA-1d | MHA-1d | HA-4d | MHA-4d | HA-7d | MHA-7d |
|-------------|-----------------------------------------------|-------|--------|-------|--------|-------|--------|
| A0A0G2K2A0  | Uncharacterized protein                       | 0.23% |        |       |        |       |        |
| D3ZXS8      | Huntingtin interacting protein 2              | 0.08% |        |       | 0.12%  |       |        |
| F1M9Q3      | Listerin E3 ubiquitin protein ligase 1        | 0.02% | 0.02%  | 0.01% | 0.01%  | 0.02% | 0.02%  |
| Q3T1J1      | Eukaryotic translation initiation factor 5A-1 | 0.34% | 0.33%  | 0.29% | 0.32%  | 0.31% | 0.27%  |
| Q5U300      | Ubiquitin-like modifier-activating enzyme 1   | 0.02% | 0.02%  | 0.03% | 0.02%  |       | 0.01%  |
| Q6P9V6      | Proteasome subunit alpha type                 | 0.99% | 0.52%  | 1.18% | 0.57%  | 1.27% | 0.67%  |
